# Supplementary material for: Influence of geometry on reductive elimination of hydrocarbyl–palladium–carbene complexes
Source: Royal Society of Chemistry journal article supplement (doi:10.1039/b417111j), 2005-01-01
Supplement: b417111j.pdf [file b417111j.pdf]

# Influence of Geometry on Reductive Elimination of Hydrocarbyl- Palladium-Carbene Complexes

*David C. Graham, Kingsley J. Cavell<sup>†</sup> and Brian F. Yates\**

School of Chemistry, University of Tasmania, Private Bag 75, Hobart, Tasmania 7001,  
Australia. <sup>†</sup>Chemistry Department, Cardiff University, Park Place, Cardiff, Wales, CF10  
3TB, U.K.

Brian.Yates@utas.edu.au

## Supporting Information

|     |                                                      |     |
|-----|------------------------------------------------------|-----|
| 1.  | Bite-Angle Complexes                                 | S2  |
| 2.  | Bite-Angle Transition Structures                     | S8  |
| 3.  | Bite-Angle Products                                  | S15 |
| 4.  | Bite-Angle Separated Products                        | S21 |
| 5.  | Twist-Angle Complexes                                | S26 |
| 6.  | Twist-Angle Transition Structures                    | S32 |
| 7.  | Twist-Angle Products                                 | S39 |
| 8.  | Twist-Angle Separated Products                       | S40 |
| 9.  | Twist-Angle CDA Model Complexes                      | S41 |
| 10. | LANL2DZAUG:6-311+G(2d,p) Basis Set<br>Implementation | S45 |

# 1. Bite-Angle Complexes

## CX-A80

B3lyp/lanl2dz optimized geometry

Energy = -723.746185 a.u.

Enthalpy Correction (inc. ZPVE) = 0.428429

NIMAG = 0

B3lyp/lanl2dzaug:6-311+G(2d,p) single point

Energy = -1393.808902

| Atom | x-coord   | y-coord   | z-coord   |
|------|-----------|-----------|-----------|
| C    | -4.195066 | -0.121414 | 0.738586  |
| N    | -2.846847 | -0.242027 | 1.118123  |
| C    | -2.028350 | -0.303674 | 0.012599  |
| N    | -2.886638 | -0.223940 | -1.061827 |
| C    | -4.220249 | -0.110231 | -0.631253 |
| Pd   | -0.004683 | -0.536365 | -0.024718 |
| C    | -0.388965 | -2.588908 | -0.119125 |
| C    | -2.478394 | -0.293894 | -2.473262 |
| C    | -2.386938 | -0.328094 | 2.512322  |
| P    | 0.710532  | 1.838125  | 0.001153  |
| C    | 2.054275  | 2.619512  | 1.089499  |
| P    | 2.457815  | -0.828665 | 0.007880  |
| C    | 3.011795  | -2.584519 | -0.427561 |
| C    | 1.102128  | 2.526052  | -1.719902 |
| C    | -0.725247 | 2.982157  | 0.482771  |
| C    | 3.201787  | -0.661557 | 1.737322  |
| C    | 3.652021  | 0.128919  | -1.105574 |
| H    | 0.137050  | -2.973130 | -1.001764 |
| H    | 0.026863  | -3.031741 | 0.796072  |
| H    | -1.453022 | -2.828439 | -0.189909 |
| H    | -1.390632 | -0.380380 | -2.515675 |
| H    | -2.922484 | -1.172350 | -2.953287 |
| H    | -2.796076 | 0.607425  | -3.008731 |
| H    | -1.300587 | -0.438226 | 2.512366  |
| H    | -2.663574 | 0.577123  | 3.063773  |
| H    | -2.831900 | -1.199062 | 3.004758  |
| H    | -5.049713 | -0.036506 | -1.315659 |
| H    | -4.998827 | -0.059018 | 1.454064  |
| H    | -0.450761 | 4.033805  | 0.343724  |
| H    | -1.598168 | 2.752582  | -0.135215 |
| H    | -0.988206 | 2.818681  | 1.532746  |
| H    | 3.053978  | 2.248778  | 0.856448  |
| H    | 2.040772  | 3.704221  | 0.935377  |
| H    | 1.835234  | 2.414706  | 2.142413  |
| H    | 3.666752  | 1.198857  | -0.893704 |
| H    | 4.661554  | -0.269402 | -0.956354 |
| H    | 3.368445  | -0.023264 | -2.151704 |
| H    | 2.797200  | -2.790047 | -1.480994 |
| H    | 4.087370  | -2.697909 | -0.252298 |
| H    | 2.469016  | -3.309180 | 0.184502  |
| H    | 2.961497  | 0.302038  | 2.188411  |
| H    | 2.783021  | -1.453220 | 2.366977  |
| H    | 4.290404  | -0.780783 | 1.696590  |

|   |          |          |           |
|---|----------|----------|-----------|
| H | 1.389050 | 3.581590 | -1.652531 |
| H | 0.202796 | 2.443807 | -2.339065 |
| H | 1.904790 | 1.965603 | -2.202399 |

**CX-A90**

B3lyp/lanl2dz optimized geometry

Energy = -723.757461 a.u.

Enthalpy Correction (inc. ZPVE) = 0.428167

NIMAG = 0

B3lyp/lanl2dzaug:6-311+G(2d,p) single point

Energy = -1393.820183

| Atom | x-coord   | y-coord   | z-coord   |
|------|-----------|-----------|-----------|
| C    | 4.141772  | -0.427646 | -0.661557 |
| N    | 2.799110  | -0.417015 | -1.079636 |
| C    | 1.947237  | -0.418764 | 0.002616  |
| N    | 2.778159  | -0.431303 | 1.100340  |
| C    | 4.128383  | -0.436162 | 0.708390  |
| Pd   | -0.093000 | -0.488783 | -0.016332 |
| C    | 0.152929  | -2.571295 | -0.043435 |
| C    | 2.324587  | -0.474429 | 2.498587  |
| C    | 2.372398  | -0.454440 | -2.486820 |
| P    | -0.405061 | 1.971441  | 0.001469  |
| C    | -0.806062 | 2.746990  | -1.676312 |
| P    | -2.553243 | -0.800940 | -0.003542 |
| C    | -3.172997 | -2.510498 | -0.504496 |
| C    | -1.667328 | 2.793862  | 1.147997  |
| C    | 1.154185  | 2.930777  | 0.478984  |
| C    | -3.643131 | 0.290941  | -1.095197 |
| C    | -3.321955 | -0.599637 | 1.709149  |
| H    | -0.344143 | -2.971565 | 0.850304  |
| H    | -0.335714 | -2.945979 | -0.951004 |
| H    | 1.202842  | -2.875153 | -0.040344 |
| H    | 1.232804  | -0.489775 | 2.508141  |
| H    | 2.696374  | -1.379897 | 2.989399  |
| H    | 2.683987  | 0.404029  | 3.045667  |
| H    | 1.281055  | -0.434904 | -2.518694 |
| H    | 2.771205  | 0.408584  | -3.030826 |
| H    | 2.724264  | -1.374506 | -2.965138 |
| H    | 4.941057  | -0.448294 | 1.416396  |
| H    | 4.968084  | -0.432138 | -1.353676 |
| H    | 1.000264  | 4.008381  | 0.352294  |
| H    | 1.405553  | 2.729195  | 1.525410  |
| H    | 1.990889  | 2.609914  | -0.148686 |
| H    | -1.722018 | 2.317329  | -2.089588 |
| H    | -0.929151 | 3.831501  | -1.578180 |
| H    | 0.015013  | 2.545904  | -2.372062 |
| H    | -3.103865 | 0.391742  | 2.114522  |
| H    | -4.408034 | -0.738015 | 1.661394  |
| H    | -2.897320 | -1.351356 | 2.382008  |
| H    | -2.699547 | -3.278949 | 0.111620  |
| H    | -4.259701 | -2.566846 | -0.377702 |
| H    | -2.924395 | -2.703621 | -1.552640 |
| H    | -3.568535 | 1.342625  | -0.807302 |
| H    | -3.337141 | 0.186158  | -2.140840 |

|   |           |           |           |
|---|-----------|-----------|-----------|
| H | -4.688694 | -0.022545 | -1.001135 |
| H | -1.577426 | 3.883586  | 1.078551  |
| H | -1.477138 | 2.489557  | 2.182249  |
| H | -2.688997 | 2.511579  | 0.879872  |

**CX-A100**

B3lyp/lanl2dz optimized geometry

Energy = -723.758963 a.u.

Enthalpy Correction (inc. ZPVE) = 0.428079

NIMAG = 0

B3lyp/lanl2dzaug:6-311+G(2d,p) single point

Energy = -1393.822104

| Atom | x-coord   | y-coord   | z-coord   |
|------|-----------|-----------|-----------|
| C    | 4.018474  | -0.808657 | -0.687551 |
| N    | 2.679872  | -0.657180 | -1.091730 |
| C    | 1.845152  | -0.558584 | -0.001208 |
| N    | 2.681753  | -0.653097 | 1.088143  |
| C    | 4.019649  | -0.805941 | 0.682414  |
| Pd   | -0.198411 | -0.401408 | -0.002800 |
| C    | -0.138539 | -2.509656 | 0.005907  |
| C    | 2.239703  | -0.638846 | 2.490759  |
| C    | 2.236731  | -0.650622 | -2.494228 |
| P    | -0.059787 | 2.074713  | -0.005849 |
| C    | -0.741133 | 2.971357  | -1.524246 |
| P    | -2.660985 | -0.694868 | -0.006057 |
| C    | -3.287682 | -1.980297 | -1.233206 |
| C    | -0.917469 | 2.983522  | 1.413820  |
| C    | 1.683850  | 2.793260  | 0.102543  |
| C    | -3.815009 | 0.756036  | -0.367963 |
| C    | -3.321129 | -1.316175 | 1.647330  |
| H    | -0.917015 | -2.908716 | 0.667167  |
| H    | -0.315498 | -2.834970 | -1.027577 |
| H    | 0.833148  | -2.881120 | 0.342256  |
| H    | 1.149521  | -0.579433 | 2.508774  |
| H    | 2.553382  | -1.558520 | 2.995322  |
| H    | 2.663156  | 0.222097  | 3.019882  |
| H    | 1.147775  | -0.572252 | -2.512585 |
| H    | 2.674767  | 0.197271  | -3.032309 |
| H    | 2.534027  | -1.581014 | -2.988989 |
| H    | 4.834073  | -0.902017 | 1.381960  |
| H    | 4.831501  | -0.908535 | -1.388190 |
| H    | 1.647805  | 3.888343  | 0.091558  |
| H    | 2.165230  | 2.462056  | 1.027926  |
| H    | 2.283620  | 2.447386  | -0.744691 |
| H    | -1.809732 | 2.764860  | -1.631499 |
| H    | -0.595207 | 4.053378  | -1.429900 |
| H    | -0.226248 | 2.619709  | -2.424062 |
| H    | -3.141034 | -0.564413 | 2.422320  |
| H    | -4.397078 | -1.513132 | 1.581893  |
| H    | -2.805971 | -2.238197 | 1.930966  |
| H    | -2.774090 | -2.931570 | -1.075361 |
| H    | -4.365983 | -2.128886 | -1.107630 |
| H    | -3.089846 | -1.640331 | -2.254684 |
| H    | -3.673999 | 1.549782  | 0.371712  |

|   |           |          |           |
|---|-----------|----------|-----------|
| H | -3.611113 | 1.156859 | -1.365861 |
| H | -4.858163 | 0.423255 | -0.329771 |
| H | -0.758600 | 4.064653 | 1.330068  |
| H | -0.514350 | 2.637991 | 2.371173  |
| H | -1.992535 | 2.782106 | 1.396408  |

**CX-A110**

B3lyp/lanl2dz optimized geometry

Energy = -723.754521 a.u.

Enthalpy Correction (inc. ZPVE) = 0.428087

NIMAG = 0

B3lyp/lanl2dzaug:6-311+G(2d,p) single point

Energy = -1393.817863

| Atom | x-coord   | y-coord   | z-coord   |
|------|-----------|-----------|-----------|
| C    | 3.826528  | -1.223305 | -0.700175 |
| N    | 2.522288  | -0.877632 | -1.097195 |
| C    | 1.713669  | -0.666151 | -0.001853 |
| N    | 2.533906  | -0.885999 | 1.083145  |
| C    | 3.833903  | -1.228162 | 0.669815  |
| Pd   | -0.313425 | -0.296429 | 0.006972  |
| C    | -0.406639 | -2.413433 | 0.013811  |
| C    | 2.097277  | -0.850446 | 2.487819  |
| C    | 2.070123  | -0.839531 | -2.497016 |
| P    | 0.302268  | 2.105921  | 0.001056  |
| C    | -1.001442 | 3.472589  | 0.106032  |
| P    | -2.781439 | -0.539566 | -0.006987 |
| C    | -3.448688 | -1.774391 | -1.263672 |
| C    | 1.463447  | 2.597614  | 1.407640  |
| C    | 1.286827  | 2.646536  | -1.518188 |
| C    | -3.861091 | 0.971170  | -0.352549 |
| C    | -3.484864 | -1.156561 | 1.629902  |
| H    | -1.214319 | -2.773082 | 0.660519  |
| H    | -0.584248 | -2.721448 | -1.024360 |
| H    | 0.535233  | -2.843575 | 0.364689  |
| H    | 1.048379  | -0.548905 | 2.516649  |
| H    | 2.193229  | -1.843918 | 2.938529  |
| H    | 2.699516  | -0.136745 | 3.059594  |
| H    | 1.047490  | -0.458378 | -2.521800 |
| H    | 2.718504  | -0.186242 | -3.090046 |
| H    | 2.084631  | -1.846503 | -2.927408 |
| H    | 4.629565  | -1.441974 | 1.364911  |
| H    | 4.614169  | -1.433457 | -1.405424 |
| H    | 1.593191  | 3.694028  | -1.419917 |
| H    | 2.180080  | 2.024392  | -1.623771 |
| H    | 0.671148  | 2.540219  | -2.417120 |
| H    | -1.557597 | 3.381624  | 1.044760  |
| H    | -0.529035 | 4.460770  | 0.067975  |
| H    | -1.702937 | 3.380434  | -0.728622 |
| H    | -3.291840 | -0.416979 | 2.413414  |
| H    | -4.566039 | -1.313186 | 1.544491  |

|   |           |           |           |
|---|-----------|-----------|-----------|
| H | -3.009889 | -2.099116 | 1.915541  |
| H | -2.987945 | -2.753691 | -1.116148 |
| H | -4.534884 | -1.868553 | -1.154520 |
| H | -3.220394 | -1.426854 | -2.276141 |
| H | -3.660959 | 1.749699  | 0.389498  |
| H | -3.634605 | 1.366769  | -1.347982 |
| H | -4.922633 | 0.702648  | -0.310380 |
| H | 1.723895  | 3.659164  | 1.331191  |
| H | 2.379858  | 2.002774  | 1.357589  |
| H | 0.975906  | 2.420333  | 2.371485  |

**CX-A120**

B3lyp/lanl2dz optimized geometry

Energy = -723.744473 a.u.

Enthalpy Correction (inc. ZPVE) = 0.428404

NIMAG = 0

B3lyp/lanl2dzaug:6-311+G(2d,p) single point

Energy = -1393.808203

| Atom | x-coord   | y-coord   | z-coord   |
|------|-----------|-----------|-----------|
| C    | 3.619176  | -1.612840 | -0.642995 |
| N    | 2.383183  | -1.093426 | -1.069200 |
| C    | 1.591418  | -0.760159 | 0.007935  |
| N    | 2.352752  | -1.079934 | 1.111339  |
| C    | 3.599996  | -1.604313 | 0.726748  |
| Pd   | -0.390956 | -0.163561 | -0.012185 |
| C    | -0.621207 | -2.286705 | -0.087799 |
| C    | 1.891029  | -0.990532 | 2.505814  |
| C    | 1.965739  | -1.018041 | -2.478451 |
| P    | 0.644813  | 2.089787  | -0.009964 |
| C    | -0.424787 | 3.653091  | -0.010367 |
| P    | -2.860251 | -0.393269 | 0.002397  |
| C    | -3.579279 | -1.515827 | -1.329481 |
| C    | 1.795702  | 2.440201  | 1.446444  |
| C    | 1.779677  | 2.429452  | -1.481412 |
| C    | -3.929472 | 1.153375  | -0.195887 |
| C    | -3.540466 | -1.111878 | 1.608639  |
| H    | -1.463761 | -2.644567 | 0.510159  |
| H    | -0.776043 | -2.528466 | -1.146709 |
| H    | 0.282532  | -2.785470 | 0.270871  |
| H    | 0.906131  | -0.519672 | 2.515849  |
| H    | 1.809083  | -1.992326 | 2.940844  |
| H    | 2.588264  | -0.395029 | 3.103987  |
| H    | 0.997915  | -0.515886 | -2.529659 |
| H    | 2.700106  | -0.456733 | -3.065163 |
| H    | 1.866053  | -2.025209 | -2.896874 |
| H    | 4.344986  | -1.918754 | 1.439565  |
| H    | 4.383586  | -1.936215 | -1.330785 |
| H    | 2.221014  | 3.428076  | -1.389310 |
| H    | 2.583038  | 1.689024  | -1.516524 |
| H    | 1.206316  | 2.380602  | -2.412431 |

|   |           |           |           |
|---|-----------|-----------|-----------|
| H | -1.054129 | 3.666526  | 0.885380  |
| H | 0.196664  | 4.555945  | -0.024134 |
| H | -1.073595 | 3.652004  | -0.892158 |
| H | -3.316585 | -0.428902 | 2.434198  |
| H | -4.626532 | -1.237039 | 1.533731  |
| H | -3.084812 | -2.081784 | 1.824571  |
| H | -3.143960 | -2.515406 | -1.268570 |
| H | -4.665095 | -1.589887 | -1.203369 |
| H | -3.363061 | -1.095576 | -2.316721 |
| H | -3.698790 | 1.863486  | 0.604512  |
| H | -3.713279 | 1.628618  | -1.158077 |
| H | -4.995157 | 0.900971  | -0.153858 |
| H | 2.231655  | 3.440282  | 1.345160  |
| H | 2.602662  | 1.703250  | 1.475065  |
| H | 1.233626  | 2.392754  | 2.384371  |

**CX-A130**

B3lyp/lanl2dz optimized geometry

Energy = -723.728431 a.u.

Enthalpy Correction (inc. ZPVE) = 0.427513

NIMAG = 0

B3lyp/lanl2dzaug:6-311+G(2d,p) single point

Energy = -1393.792304

| Atom | x-coord   | y-coord   | z-coord   |
|------|-----------|-----------|-----------|
| Pd   | 0.450524  | -0.016401 | 0.000639  |
| P    | -0.961162 | 2.022536  | -0.016109 |
| P    | 2.919906  | -0.245609 | 0.004632  |
| C    | 0.790933  | -2.152655 | -0.052638 |
| H    | 1.691464  | -2.479412 | 0.470976  |
| H    | -0.054740 | -2.683166 | 0.390114  |
| H    | 0.861843  | -2.398749 | -1.118786 |
| C    | -1.467654 | -0.833522 | 0.008805  |
| N    | -2.194265 | -1.275868 | -1.075021 |
| C    | -1.768436 | -1.166873 | -2.479631 |
| H    | -0.871438 | -0.546871 | -2.526461 |
| H    | -1.536184 | -2.159162 | -2.880735 |
| H    | -2.558824 | -0.711514 | -3.084762 |
| N    | -2.196387 | -1.240342 | 1.105878  |
| C    | -1.760186 | -1.099068 | 2.504351  |
| H    | -0.851926 | -0.493999 | 2.526744  |
| H    | -2.538214 | -0.614502 | 3.102642  |
| H    | -1.539840 | -2.083576 | 2.931029  |
| C    | -3.358854 | -1.947233 | -0.659227 |
| H    | -4.065929 | -2.371405 | -1.353563 |
| C    | -3.359932 | -1.925146 | 0.710405  |
| H    | -4.068243 | -2.326856 | 1.416768  |
| C    | 3.991273  | 1.302875  | -0.197464 |
| C    | -2.134432 | 2.176247  | -1.490125 |
| C    | -2.158633 | 2.202582  | 1.435232  |
| H    | -2.723023 | 3.135593  | 1.328930  |

|   |           |           |           |
|---|-----------|-----------|-----------|
| H | -2.861486 | 1.366443  | 1.459527  |
| H | -1.601016 | 2.233170  | 2.376303  |
| C | -0.172535 | 3.747859  | -0.024728 |
| H | 0.465966  | 3.851393  | -0.908058 |
| H | -0.936422 | 4.534108  | -0.039029 |
| H | 0.449593  | 3.868104  | 0.868178  |
| C | 3.642436  | -1.345965 | -1.345697 |
| H | 3.400915  | -0.920749 | -2.324939 |
| H | 4.731701  | -1.389156 | -1.235849 |
| H | 3.238848  | -2.358527 | -1.290535 |
| C | 3.623995  | -0.953479 | 1.606355  |
| H | 3.154880  | -1.907123 | 1.859744  |
| H | 4.704720  | -1.102771 | 1.504317  |
| H | 3.438678  | -0.245148 | 2.420070  |
| H | 3.775211  | 1.773238  | -1.162215 |
| H | 3.755728  | 2.016905  | 0.598123  |
| H | 5.057824  | 1.053769  | -0.151967 |
| H | -2.702116 | 3.109838  | -1.409413 |
| H | -2.835580 | 1.338596  | -1.512237 |
| H | -1.560917 | 2.191806  | -2.421984 |

## 2. Bite-Angle Transition Structures

### TS-A80

B3lyp/lanl2dz optimized geometry

Energy = -723.705201 a.u.

Enthalpy Correction (inc. ZPVE) = 0.426404

NIMAG = 1

B3lyp/lanl2dzaug:6-311+G(2d,p) single point

Energy = -1393.764385

| Atom | x-coord   | y-coord   | z-coord   |
|------|-----------|-----------|-----------|
| N    | -2.854214 | -0.123629 | -1.083319 |
| C    | -4.098054 | 0.334693  | -0.613946 |
| C    | -4.075285 | 0.255195  | 0.752255  |
| N    | -2.817701 | -0.250635 | 1.124054  |
| C    | -2.040817 | -0.523047 | -0.011869 |
| C    | -2.405496 | -0.532318 | 2.503072  |
| Pd   | -0.017634 | -0.471964 | -0.036427 |
| P    | 0.890224  | 1.834297  | 0.049338  |
| C    | 1.445918  | 2.486736  | -1.639758 |
| C    | -2.495550 | -0.236386 | -2.501666 |
| P    | 2.412709  | -0.965736 | -0.031368 |
| C    | 3.167467  | -1.007906 | 1.708494  |
| C    | -1.481665 | -2.265903 | -0.136613 |



|   |           |           |           |
|---|-----------|-----------|-----------|
| C | 3.774010  | -0.110489 | -1.044012 |
| C | 2.777138  | -2.757112 | -0.560376 |
| C | -0.421655 | 3.137478  | 0.479833  |
| C | 2.269489  | 2.418354  | 1.212799  |
| H | -1.079672 | -2.585420 | -1.103058 |
| H | -0.922505 | -2.715912 | 0.691650  |
| H | -2.514170 | -2.623039 | -0.065685 |
| H | -1.408767 | -0.301182 | -2.595870 |
| H | -2.951272 | -1.123982 | -2.958488 |
| H | -2.837791 | 0.651804  | -3.042932 |
| H | -1.318147 | -0.448481 | 2.580778  |
| H | -2.860604 | 0.198238  | 3.178854  |
| H | -2.712969 | -1.538657 | 2.815679  |
| H | -4.869375 | 0.691892  | -1.276768 |
| H | -4.823897 | 0.531824  | 1.476776  |
| H | -0.033723 | 4.152383  | 0.332896  |
| H | -1.299904 | 2.989670  | -0.156036 |
| H | -0.725771 | 3.019546  | 1.525132  |
| H | 3.224741  | 1.932467  | 1.007015  |
| H | 2.395191  | 3.500362  | 1.092667  |
| H | 1.981995  | 2.211805  | 2.248485  |
| H | 3.902847  | 0.939670  | -0.774112 |
| H | 4.721659  | -0.632642 | -0.871780 |
| H | 3.528775  | -0.175633 | -2.109126 |
| H | 2.552731  | -2.879332 | -1.625413 |
| H | 3.828085  | -3.016111 | -0.385935 |
| H | 2.141662  | -3.442538 | 0.010048  |
| H | 1.873613  | 3.490925  | -1.538792 |
| H | 2.181671  | 1.826351  | -2.100695 |
| H | 0.569247  | 2.540863  | -2.293445 |
| H | 4.232055  | -1.263146 | 1.657547  |
| H | 3.053144  | -0.050140 | 2.219880  |
| H | 2.648714  | -1.775576 | 2.292402  |

**TS-A90**

B3lyp/lanl2dz optimized geometry

Energy = -723.718598 a.u.

Enthalpy Correction (inc. ZPVE) = 0.426372

NIMAG = 1

B3lyp/lanl2dzaug:6-311+G(2d,p) single point

Energy = -1393.777815

| Atom | x-coord   | y-coord   | z-coord   |
|------|-----------|-----------|-----------|
| Pd   | 0.080471  | -0.437845 | -0.029178 |
| P    | 0.589518  | 1.988363  | 0.040024  |
| P    | 2.507555  | -0.947338 | -0.020049 |
| C    | -1.233141 | -2.347532 | -0.122258 |
| H    | -0.688347 | -2.649859 | -1.023157 |
| H    | -0.763990 | -2.755064 | 0.778817  |
| H    | -2.243901 | -2.762765 | -0.191515 |
| C    | -1.935746 | -0.637980 | -0.015449 |
| N    | -2.772327 | -0.304812 | -1.090108 |
| C    | -2.394320 | -0.403536 | -2.504124 |
| H    | -1.316147 | -0.252652 | -2.602737 |
| H    | -2.660140 | -1.383305 | -2.921364 |

|   |           |           |           |
|---|-----------|-----------|-----------|
| H | -2.909681 | 0.372859  | -3.078155 |
| N | -2.738406 | -0.435962 | 1.115360  |
| C | -2.312521 | -0.673591 | 2.499025  |
| H | -1.223288 | -0.604325 | 2.557301  |
| H | -2.744989 | 0.088275  | 3.155589  |
| H | -2.631194 | -1.663113 | 2.850526  |
| C | -4.055445 | 0.040295  | -0.628435 |
| H | -4.851173 | 0.328806  | -1.295835 |
| C | -4.033967 | -0.039812 | 0.737567  |
| H | -4.807379 | 0.169436  | 1.458635  |
| C | 3.334368  | -0.881850 | 1.681672  |
| C | 1.140019  | 2.734036  | -1.608831 |
| C | -0.884812 | 3.094081  | 0.471316  |
| H | -0.627144 | 4.153178  | 0.355601  |
| H | -1.727004 | 2.852720  | -0.184636 |
| H | -1.188412 | 2.912376  | 1.507379  |
| C | 1.891685  | 2.652994  | 1.240908  |
| H | 2.886125  | 2.275461  | 0.987494  |
| H | 1.912240  | 3.747944  | 1.197192  |
| H | 1.644929  | 2.343377  | 2.261203  |
| C | 3.735286  | 0.025131  | -1.085874 |
| H | 3.791107  | 1.070086  | -0.767032 |
| H | 4.733809  | -0.418143 | -1.001064 |
| H | 3.422316  | -0.008766 | -2.134536 |
| C | 2.939753  | -2.715469 | -0.551829 |
| H | 2.679904  | -2.857583 | -1.606249 |
| H | 4.009142  | -2.916196 | -0.419135 |
| H | 2.366404  | -3.430539 | 0.047321  |
| H | 1.386543  | 3.795087  | -1.486533 |
| H | 2.014330  | 2.204167  | -1.994851 |
| H | 0.327213  | 2.640672  | -2.336186 |
| H | 4.401135  | -1.119779 | 1.601773  |
| H | 3.221188  | 0.110991  | 2.125622  |
| H | 2.856809  | -1.613025 | 2.342188  |

**TS-A100**

B3lyp/lanl2dz optimized geometry

Energy = -723.722673 a.u.

Enthalpy Correction (inc. ZPVE) = 0.426119

NIMAG = 1

B3lyp/lanl2dzaug:6-311+G(2d,p) single point

Energy = -1393.782477

| Atom | x-coord   | y-coord   | z-coord   |
|------|-----------|-----------|-----------|
| Pd   | 0.186126  | -0.368390 | -0.005964 |
| P    | 0.242718  | 2.110934  | 0.006208  |
| P    | 2.617984  | -0.854669 | -0.005137 |
| C    | -0.903294 | -2.418113 | -0.011385 |
| H    | -0.334782 | -2.716045 | -0.898240 |
| H    | -0.394704 | -2.723751 | 0.908256  |
| H    | -1.871501 | -2.927576 | -0.047499 |
| C    | -1.803260 | -0.772092 | -0.001328 |
| N    | -2.650735 | -0.592107 | -1.101225 |
| C    | -2.240193 | -0.717965 | -2.504380 |
| H    | -1.160774 | -0.564692 | -2.578536 |

|   |           |           |           |
|---|-----------|-----------|-----------|
| H | -2.491808 | -1.708376 | -2.904289 |
| H | -2.743496 | 0.043331  | -3.109298 |
| N | -2.642785 | -0.607958 | 1.106316  |
| C | -2.218313 | -0.736426 | 2.505039  |
| H | -1.144426 | -0.545345 | 2.574541  |
| H | -2.744564 | -0.000410 | 3.121401  |
| H | -2.432300 | -1.739370 | 2.895334  |
| C | -3.973598 | -0.371891 | -0.675107 |
| H | -4.784331 | -0.211035 | -1.367041 |
| C | -3.968374 | -0.381277 | 0.693200  |
| H | -4.773611 | -0.228483 | 1.393291  |
| C | 3.474650  | -0.734437 | 1.676954  |
| C | 0.683718  | 2.915517  | -1.645946 |
| C | -1.388797 | 2.962632  | 0.435264  |
| H | -1.301406 | 4.049849  | 0.326889  |
| H | -2.179193 | 2.595603  | -0.226763 |
| H | -1.664762 | 2.728972  | 1.468599  |
| C | 1.445858  | 2.955553  | 1.194118  |
| H | 2.473923  | 2.667597  | 0.952867  |
| H | 1.357694  | 4.045518  | 1.120863  |
| H | 1.228181  | 2.648653  | 2.221936  |
| C | 3.762668  | 0.185861  | -1.094902 |
| H | 3.735208  | 1.233675  | -0.777871 |
| H | 4.794975  | -0.175228 | -1.024859 |
| H | 3.435418  | 0.125929  | -2.138039 |
| C | 3.095117  | -2.605438 | -0.545014 |
| H | 2.808210  | -2.761690 | -1.590334 |
| H | 4.175109  | -2.763729 | -0.446164 |
| H | 2.571471  | -3.341334 | 0.074256  |
| H | 0.724116  | 4.006236  | -1.545211 |
| H | 1.656062  | 2.550465  | -1.989566 |
| H | -0.070465 | 2.655263  | -2.395390 |
| H | 4.545162  | -0.949848 | 1.584256  |
| H | 3.345890  | 0.270705  | 2.090561  |
| H | 3.025928  | -1.453995 | 2.369623  |

**TS-A110**

B3lyp/lanl2dz optimized geometry

Energy = -723.721832 a.u.

Enthalpy Correction (inc. ZPVE) = 0.426106

NIMAG = 1

B3lyp/lanl2dzaug:6-311+G(2d,p) single point

Energy = -1393.781736

| Atom | x-coord   | y-coord   | z-coord   |
|------|-----------|-----------|-----------|
| Pd   | 0.294466  | -0.261683 | -0.003857 |
| P    | -0.165642 | 2.175176  | 0.016611  |
| P    | 2.741811  | -0.662801 | -0.006308 |
| C    | -0.494278 | -2.448357 | -0.030914 |
| H    | 0.097811  | -2.666441 | -0.924721 |
| H    | 0.051550  | -2.697805 | 0.884095  |

|   |           |           |           |
|---|-----------|-----------|-----------|
| H | -1.399125 | -3.063361 | -0.065941 |
| C | -1.629361 | -0.917708 | -0.003931 |
| N | -2.493484 | -0.852952 | -1.101240 |
| C | -2.069864 | -0.905547 | -2.505499 |
| H | -1.029670 | -0.579166 | -2.580699 |
| H | -2.157926 | -1.922488 | -2.907925 |
| H | -2.692312 | -0.234877 | -3.106626 |
| N | -2.480660 | -0.890135 | 1.103975  |
| C | -2.039682 | -0.973051 | 2.501306  |
| H | -1.011012 | -0.611761 | 2.577169  |
| H | -2.679086 | -0.344352 | 3.129171  |
| H | -2.087666 | -2.004547 | 2.872210  |
| C | -3.834769 | -0.835034 | -0.674234 |
| H | -4.660722 | -0.789763 | -1.365400 |
| C | -3.826463 | -0.857779 | 0.693844  |
| H | -4.644095 | -0.834116 | 1.395836  |
| C | 3.568785  | -0.660445 | 1.694301  |
| C | -0.156824 | 2.988103  | -1.689007 |
| C | -1.859269 | 2.677031  | 0.686248  |
| H | -2.009245 | 3.757596  | 0.579997  |
| H | -2.646182 | 2.148945  | 0.139692  |
| H | -1.930072 | 2.411588  | 1.745913  |
| C | 0.990622  | 3.302328  | 0.998025  |
| H | 2.006475  | 3.228647  | 0.596695  |
| H | 0.659292  | 4.345455  | 0.937682  |
| H | 1.005798  | 2.992369  | 2.047688  |
| C | 3.883242  | 0.477916  | -0.991957 |
| H | 3.819040  | 1.497093  | -0.596606 |
| H | 4.923306  | 0.138311  | -0.929130 |
| H | 3.575095  | 0.489980  | -2.042479 |
| C | 3.248091  | -2.359247 | -0.673707 |
| H | 2.982699  | -2.435056 | -1.733556 |
| H | 4.328513  | -2.508793 | -0.567769 |
| H | 2.727365  | -3.150718 | -0.124814 |
| H | -0.367302 | 4.060663  | -1.606809 |
| H | 0.822189  | 2.849907  | -2.158114 |
| H | -0.917209 | 2.523524  | -2.324664 |
| H | 4.637835  | -0.885546 | 1.607345  |
| H | 3.446627  | 0.321319  | 2.162888  |
| H | 3.097682  | -1.412489 | 2.335743  |

**TS-A120**

B3lyp/lanl2dz optimized geometry

Energy = -723.718025 a.u.

Enthalpy Correction (inc. ZPVE) = 0.426281

NIMAG = 1

B3lyp/lanl2dzaug:6-311+G(2d,p) single point

Energy = -1393.777831

| Atom | x-coord   | y-coord   | z-coord  |
|------|-----------|-----------|----------|
| C    | -3.604744 | -1.336305 | 0.722751 |

|    |           |           |           |
|----|-----------|-----------|-----------|
| N  | -2.265108 | -1.147612 | 1.112670  |
| C  | -1.439911 | -1.028500 | -0.006198 |
| N  | -2.318051 | -1.095758 | -1.089834 |
| C  | -3.637576 | -1.304655 | -0.644869 |
| Pd | 0.384675  | -0.121699 | -0.017313 |
| C  | -0.075054 | -2.405896 | -0.076411 |
| C  | -1.907564 | -1.092647 | -2.499665 |
| C  | -1.791141 | -1.180904 | 2.501723  |
| P  | -0.580336 | 2.162580  | 0.017632  |
| C  | 0.525200  | 3.645707  | 0.400825  |
| P  | 2.845630  | -0.428394 | -0.010783 |
| C  | 3.433168  | -1.916413 | -1.019984 |
| C  | -1.380218 | 2.677666  | -1.614205 |
| C  | -1.997733 | 2.406025  | 1.241481  |
| C  | 3.568333  | -0.814701 | 1.694293  |
| C  | 4.017659  | 0.921445  | -0.626270 |
| H  | 0.486332  | -2.536866 | -1.005127 |
| H  | 0.544488  | -2.595891 | 0.805190  |
| H  | -0.902528 | -3.122202 | -0.070075 |
| H  | -0.963525 | -0.552111 | -2.600228 |
| H  | -1.778776 | -2.115217 | -2.875852 |
| H  | -2.667565 | -0.589495 | -3.105513 |
| H  | -0.820112 | -0.683539 | 2.560861  |
| H  | -2.497426 | -0.650066 | 3.147791  |
| H  | -1.691080 | -2.212836 | 2.860475  |
| H  | -4.469861 | -1.391195 | -1.324381 |
| H  | -4.403622 | -1.454330 | 1.436739  |
| H  | -2.414043 | 3.415225  | 1.144874  |
| H  | -2.786395 | 1.673513  | 1.046949  |
| H  | -1.631222 | 2.270952  | 2.264132  |
| H  | 1.331539  | 3.700072  | -0.337362 |
| H  | -0.049477 | 4.578775  | 0.373866  |
| H  | 0.967829  | 3.526250  | 1.394898  |
| H  | 3.881633  | 1.825699  | -0.024277 |
| H  | 5.062093  | 0.597128  | -0.553818 |
| H  | 3.788678  | 1.158824  | -1.670421 |
| H  | 3.208798  | -1.758350 | -2.080053 |
| H  | 4.513993  | -2.052825 | -0.903426 |
| H  | 2.927466  | -2.827686 | -0.685200 |
| H  | -1.836617 | 3.669907  | -1.521447 |
| H  | -0.623525 | 2.705618  | -2.404512 |
| H  | -2.153964 | 1.954859  | -1.889671 |
| H  | 4.641920  | -1.023220 | 1.622426  |
| H  | 3.414231  | 0.039992  | 2.360757  |
| H  | 3.065859  | -1.686963 | 2.125407  |

**TS-A130**

B3lyp/lanl2dz optimized geometry

Energy = -723.710921 a.u.

Enthalpy Correction (inc. ZPVE) = 0.426382

NIMAG = 1

B3lyp/lanl2dzaug:6-311+G(2d,p) single point

Energy = -1393.770922

| Atom | x-coord   | y-coord   | z-coord   |
|------|-----------|-----------|-----------|
| Pd   | 0.440728  | 0.032165  | -0.010472 |
| P    | -0.962367 | 2.076983  | 0.010542  |
| P    | 2.909119  | -0.207500 | -0.007625 |
| C    | 0.313735  | -2.304454 | -0.067968 |
| H    | 0.847550  | -2.384583 | -1.017351 |
| H    | 0.976331  | -2.418576 | 0.793590  |
| H    | -0.442746 | -3.093683 | -0.024221 |
| C    | -1.266828 | -1.088885 | -0.003772 |
| N    | -2.110641 | -1.301118 | -1.091208 |
| C    | -1.689638 | -1.247350 | -2.497550 |
| H    | -0.815667 | -0.597801 | -2.585272 |
| H    | -1.434759 | -2.247337 | -2.869090 |
| H    | -2.496909 | -0.838086 | -3.112759 |
| N    | -2.067292 | -1.332230 | 1.108970  |
| C    | -1.590142 | -1.310590 | 2.497774  |
| H    | -0.723665 | -0.648761 | 2.567838  |
| H    | -2.378059 | -0.932260 | 3.156146  |
| H    | -1.303741 | -2.316030 | 2.829845  |
| C    | -3.384691 | -1.715023 | -0.655414 |
| H    | -4.186561 | -1.936874 | -1.340782 |
| C    | -3.357614 | -1.734359 | 0.712713  |
| H    | -4.131745 | -1.976286 | 1.422721  |
| C    | 3.571453  | -1.045908 | 1.553988  |
| C    | -2.074171 | 2.274803  | -1.503352 |
| C    | -2.214754 | 2.162492  | 1.421330  |
| H    | -2.835482 | 3.059723  | 1.318589  |
| H    | -2.858723 | 1.279122  | 1.401929  |
| H    | -1.689675 | 2.202839  | 2.380755  |
| C    | -0.146520 | 3.778703  | 0.116286  |
| H    | 0.532190  | 3.910461  | -0.732218 |
| H    | -0.898052 | 4.576772  | 0.104823  |
| H    | 0.436174  | 3.846748  | 1.040386  |
| C    | 4.083745  | 1.266890  | -0.162948 |
| H    | 3.898833  | 1.967984  | 0.657332  |
| H    | 5.130501  | 0.943463  | -0.130425 |
| H    | 3.897253  | 1.783473  | -1.110102 |
| C    | 3.572603  | -1.346741 | -1.364876 |
| H    | 3.366262  | -0.910050 | -2.347309 |
| H    | 4.655121  | -1.474909 | -1.253324 |
| H    | 3.097468  | -2.330914 | -1.308396 |
| H    | -2.693348 | 3.173193  | -1.400662 |
| H    | -1.460772 | 2.367066  | -2.404939 |
| H    | -2.727079 | 1.403302  | -1.601611 |
| H    | 4.650024  | -1.218710 | 1.466286  |
| H    | 3.382713  | -0.406715 | 2.422368  |
| H    | 3.074257  | -2.008443 | 1.712234  |

### 3. Bite-Angle Products

#### PR-A80

B3lyp/lanl2dz optimized geometry

Energy = -723.716690 a.u.

Enthalpy Correction (inc. ZPVE) = 0.427632

NIMAG = 0

B3lyp/lanl2dzaug:6-311+G(2d,p) single point

Energy = -1393.775015

| Atom | x-coord   | y-coord   | z-coord   |
|------|-----------|-----------|-----------|
| Pd   | -0.055109 | -0.607489 | -0.102683 |
| P    | -0.639668 | 1.794249  | 0.098177  |
| P    | -2.527858 | -0.772459 | -0.009414 |
| C    | 1.753668  | -2.290855 | -0.538509 |
| H    | 2.218736  | -3.045661 | 0.103221  |
| H    | 0.644000  | -2.475743 | -0.443715 |
| H    | 2.006322  | -2.500766 | -1.579522 |
| C    | 2.206393  | -0.891320 | -0.148222 |
| N    | 2.767114  | -0.612061 | 1.114689  |
| C    | 2.375067  | -1.239031 | 2.381600  |
| H    | 1.545663  | -0.697577 | 2.852778  |
| H    | 2.062692  | -2.273812 | 2.215069  |
| H    | 3.231509  | -1.245999 | 3.062564  |
| N    | 2.903964  | -0.050727 | -1.036909 |
| C    | 2.660788  | 0.016281  | -2.479277 |
| H    | 1.616952  | 0.289063  | -2.680533 |
| H    | 3.317156  | 0.771805  | -2.917798 |
| H    | 2.878565  | -0.943228 | -2.962947 |
| C    | 3.636204  | 0.483860  | 1.011542  |
| H    | 4.131670  | 0.908066  | 1.869483  |
| C    | 3.720730  | 0.826740  | -0.312435 |
| H    | 4.301209  | 1.598529  | -0.790648 |
| C    | -3.089671 | -2.548033 | 0.398539  |
| H    | -4.172680 | -2.661356 | 0.268033  |
| H    | -2.828526 | -2.787564 | 1.434855  |
| C    | -1.134356 | 2.244588  | 1.873234  |
| H    | -0.227296 | 2.251488  | 2.486795  |
| H    | -1.588662 | 3.241837  | 1.905364  |
| C    | 0.688254  | 3.136803  | -0.173873 |
| H    | 0.302253  | 4.130638  | 0.084503  |
| H    | 1.561310  | 2.913285  | 0.446230  |
| H    | 0.996184  | 3.138382  | -1.225160 |
| C    | -2.011265 | 2.592067  | -0.946209 |
| H    | -2.985761 | 2.127046  | -0.796129 |
| H    | -2.084894 | 3.651442  | -0.675190 |
| H    | -1.744288 | 2.517771  | -2.005227 |
| C    | -3.312115 | -0.622308 | -1.734931 |
| H    | -2.906035 | -1.419605 | -2.366402 |
| H    | -4.400395 | -0.739077 | -1.674777 |

|   |           |           |           |
|---|-----------|-----------|-----------|
| H | -3.078540 | 0.337045  | -2.201446 |
| C | -3.802524 | 0.130028  | 1.083354  |
| H | -3.779903 | 1.214116  | 0.957658  |
| H | -4.804425 | -0.232899 | 0.826872  |
| H | -3.605003 | -0.107256 | 2.134021  |
| H | -2.574906 | -3.252800 | -0.262790 |
| H | -1.829590 | 1.517073  | 2.293482  |

**PR-A90**

B3lyp/lanl2dz optimized geometry

Energy = -723.732252 a.u.

Enthalpy Correction (inc. ZPVE) = 0.427612

NIMAG = 0

B3lyp/lanl2dzaug:6-311+G(2d,p) single point

Energy = -1393.789998

| Atom | x-coord   | y-coord   | z-coord   |
|------|-----------|-----------|-----------|
| Pd   | -0.148272 | -0.497964 | -0.270081 |
| P    | -0.377020 | 1.927943  | 0.191491  |
| P    | -2.602722 | -0.772297 | -0.044655 |
| C    | 1.612240  | -2.146185 | -1.131198 |
| H    | 0.495526  | -2.271201 | -1.109308 |
| H    | 1.891513  | -2.011627 | -2.177600 |
| H    | 2.014517  | -3.101605 | -0.775793 |
| C    | 2.123284  | -0.990547 | -0.292249 |
| N    | 2.507084  | -1.137381 | 1.051008  |
| C    | 1.959821  | -2.104414 | 2.012404  |
| H    | 1.275012  | -1.614060 | 2.713458  |
| H    | 1.409087  | -2.887164 | 1.485898  |
| H    | 2.777514  | -2.568677 | 2.574120  |
| N    | 2.978332  | -0.002891 | -0.803847 |
| C    | 2.964251  | 0.467425  | -2.191020 |
| H    | 1.949479  | 0.769371  | -2.477420 |
| H    | 3.629206  | 1.329116  | -2.283380 |
| H    | 3.316234  | -0.311517 | -2.877811 |
| C    | 3.442436  | -0.147145 | 1.381393  |
| H    | 3.831301  | -0.032377 | 2.379893  |
| C    | 3.731591  | 0.550455  | 0.237318  |
| H    | 4.416791  | 1.367300  | 0.080255  |
| C    | -3.618200 | -0.281541 | -1.569820 |
| C    | -0.695398 | 2.329301  | 2.017047  |
| C    | 1.017376  | 3.173455  | -0.163151 |
| H    | 0.741817  | 4.176131  | 0.185615  |
| H    | 1.928545  | 2.851727  | 0.349528  |
| H    | 1.209919  | 3.214657  | -1.240689 |
| C    | -1.807986 | 2.835728  | -0.658521 |
| H    | -2.774030 | 2.448740  | -0.325411 |
| H    | -1.759434 | 3.903899  | -0.417879 |
| H    | -1.733088 | 2.711660  | -1.743260 |
| C    | -3.589057 | 0.048717  | 1.355257  |
| H    | -3.565217 | 1.139045  | 1.279870  |
| H    | -4.633952 | -0.279251 | 1.307582  |
| H    | -3.171344 | -0.250781 | 2.321914  |
| C    | -3.215771 | -2.557577 | 0.179690  |
| H    | -2.832700 | -2.961909 | 1.122689  |



|   |           |           |           |
|---|-----------|-----------|-----------|
| H | -4.311477 | -2.599383 | 0.192026  |
| H | -2.844233 | -3.177816 | -0.642685 |
| H | -0.962531 | 3.385958  | 2.137135  |
| H | -1.500222 | 1.707446  | 2.415507  |
| H | 0.216240  | 2.127118  | 2.588979  |
| H | -4.690394 | -0.401140 | -1.374704 |
| H | -3.417746 | 0.753974  | -1.854853 |
| H | -3.335112 | -0.930107 | -2.405497 |

**PR-A100**

B3lyp/lanl2dz optimized geometry

Energy = -723.740792 a.u.

Enthalpy Correction (inc. ZPVE) = 0.428455

NIMAG = 0

B3lyp/lanl2dzaug:6-311+G(2d,p) single point

Energy = -1393.800975

| Atom | x-coord   | y-coord   | z-coord   |
|------|-----------|-----------|-----------|
| Pd   | -0.335996 | -0.360131 | -0.216394 |
| P    | -0.567446 | 2.071872  | 0.210447  |
| P    | -2.709195 | -1.056923 | -0.035270 |
| C    | 1.719458  | -2.134875 | -0.837591 |
| H    | 0.608806  | -1.972190 | -0.607806 |
| H    | 1.803669  | -2.193252 | -1.924896 |
| H    | 1.938520  | -3.122077 | -0.415278 |
| C    | 2.623108  | -1.102061 | -0.279232 |
| N    | 3.110737  | -1.067682 | 1.003551  |
| C    | 2.702112  | -1.980774 | 2.084834  |
| H    | 1.611156  | -1.990111 | 2.171501  |
| H    | 3.065877  | -2.996349 | 1.895152  |
| H    | 3.127132  | -1.627321 | 3.026543  |
| N    | 3.243575  | -0.088995 | -0.967527 |
| C    | 2.930126  | 0.296166  | -2.351749 |
| H    | 1.873606  | 0.585623  | -2.417146 |
| H    | 3.556688  | 1.143973  | -2.635863 |
| H    | 3.128988  | -0.530381 | -3.040869 |
| C    | 3.999009  | 0.008739  | 1.133149  |
| H    | 4.496544  | 0.239022  | 2.060371  |
| C    | 4.077677  | 0.620512  | -0.092914 |
| H    | 4.653963  | 1.473354  | -0.410398 |
| C    | -3.764950 | -0.604991 | -1.543102 |
| C    | -0.954309 | 2.485658  | 2.019809  |
| C    | 0.761251  | 3.388586  | -0.144722 |
| H    | 0.424632  | 4.383726  | 0.170995  |
| H    | 1.679709  | 3.133247  | 0.394641  |
| H    | 0.975965  | 3.412060  | -1.219044 |
| C    | -2.041387 | 2.874028  | -0.671528 |
| H    | -2.972387 | 2.375947  | -0.385194 |
| H    | -2.113788 | 3.935241  | -0.405434 |
| H    | -1.916254 | 2.784394  | -1.755353 |
| C    | -3.706434 | -0.262819 | 1.368408  |
| H    | -3.713597 | 0.826395  | 1.263793  |
| H    | -4.741368 | -0.624597 | 1.352544  |
| H    | -3.253114 | -0.519780 | 2.331294  |
| C    | -3.214641 | -2.872749 | 0.197361  |

|   |           |           |           |
|---|-----------|-----------|-----------|
| H | -2.792247 | -3.253582 | 1.133394  |
| H | -4.305731 | -2.980204 | 0.227306  |
| H | -2.818770 | -3.469408 | -0.631197 |
| H | -1.227348 | 3.542398  | 2.126513  |
| H | -1.777938 | 1.862596  | 2.378780  |
| H | -0.072550 | 2.280493  | 2.635784  |
| H | -4.823647 | -0.822117 | -1.357137 |
| H | -3.650532 | 0.456884  | -1.778992 |
| H | -3.426881 | -1.187978 | -2.406038 |

**PR-A110**

B3lyp/lanl2dz optimized geometry

Energy = -723.746450 a.u.

Enthalpy Correction (inc. ZPVE) = 0.427518

NIMAG = 0

B3lyp/lanl2dzaug:6-311+G(2d,p) single point

Energy = -1393.806983

| Atom | x-coord   | y-coord   | z-coord   |
|------|-----------|-----------|-----------|
| Pd   | 0.447089  | -0.233382 | -0.056525 |
| P    | 0.607745  | 2.239785  | 0.033112  |
| P    | 2.716296  | -1.232952 | -0.012247 |
| C    | -1.722166 | -2.283749 | -0.198929 |
| H    | -1.813021 | -2.796443 | -1.160255 |
| H    | -0.661471 | -1.880431 | -0.148447 |
| H    | -1.803168 | -3.024002 | 0.602774  |
| C    | -2.740678 | -1.217940 | -0.055218 |
| N    | -3.364662 | -0.542636 | -1.069089 |
| C    | -3.056666 | -0.697809 | -2.502107 |
| H    | -2.003727 | -0.456269 | -2.683098 |
| H    | -3.263729 | -1.719860 | -2.834005 |
| H    | -3.683993 | -0.011616 | -3.074391 |
| N    | -3.256181 | -0.741185 | 1.119664  |
| C    | -2.810756 | -1.152055 | 2.463547  |
| H    | -1.742150 | -0.941804 | 2.579664  |
| H    | -3.370206 | -0.584862 | 3.210059  |
| H    | -2.996687 | -2.218747 | 2.623120  |
| C    | -4.257612 | 0.389572  | -0.524182 |
| H    | -4.857612 | 1.041661  | -1.136470 |
| C    | -4.190127 | 0.265454  | 0.841551  |
| H    | -4.722378 | 0.790693  | 1.616792  |
| C    | 3.107751  | -3.048710 | 0.381062  |
| H    | 4.188150  | -3.235246 | 0.350379  |
| H    | 2.612473  | -3.696616 | -0.349984 |
| C    | 2.015579  | 2.873541  | -1.065326 |
| H    | 1.792609  | 2.652963  | -2.114107 |
| H    | 2.145228  | 3.955754  | -0.944336 |
| C    | -0.740435 | 3.509966  | -0.398309 |
| H    | -0.372235 | 4.535072  | -0.268397 |
| H    | -1.050794 | 3.372889  | -1.439889 |
| H    | -1.609456 | 3.356269  | 0.250331  |

|   |          |           |           |
|---|----------|-----------|-----------|
| C | 1.153201 | 2.886172  | 1.729045  |
| H | 2.015431 | 2.311945  | 2.081342  |
| H | 1.423306 | 3.947739  | 1.674979  |
| H | 0.337980 | 2.760385  | 2.449246  |
| C | 3.868906 | -0.366704 | 1.216872  |
| H | 3.495379 | -0.511660 | 2.235677  |
| H | 4.885649 | -0.771481 | 1.146241  |
| H | 3.898532 | 0.707054  | 1.005641  |
| C | 3.676047 | -1.013269 | -1.630790 |
| H | 3.644533 | 0.036175  | -1.939514 |
| H | 4.721184 | -1.323304 | -1.510810 |
| H | 3.210627 | -1.617810 | -2.416039 |
| H | 2.730613 | -3.296596 | 1.378992  |
| H | 2.949876 | 2.371146  | -0.795642 |

**PR-A120**

B3lyp/lanl2dz optimized geometry

Energy = -723.753195 a.u.

Enthalpy Correction (inc. ZPVE) = 0.428595

NIMAG = 0

B3lyp/lanl2dzaug:6-311+G(2d,p) single point

Energy = -1393.813311

| Atom | x-coord   | y-coord   | z-coord   |
|------|-----------|-----------|-----------|
| Pd   | 0.668837  | -0.091827 | -0.048411 |
| P    | 0.957849  | 2.368762  | 0.062808  |
| P    | 2.649969  | -1.579393 | 0.064151  |
| C    | -2.020114 | -1.588083 | 1.024544  |
| H    | -1.854720 | -2.624571 | 0.706221  |
| H    | -1.045229 | -1.052760 | 0.900598  |
| H    | -2.273096 | -1.588053 | 2.087147  |
| C    | -3.082005 | -0.936279 | 0.213330  |
| N    | -3.030199 | -0.709147 | -1.131077 |
| C    | -1.891487 | -1.061988 | -2.004847 |
| H    | -0.954077 | -0.648820 | -1.583125 |
| H    | -1.803728 | -2.149146 | -2.095310 |
| H    | -2.060054 | -0.628805 | -2.992906 |
| N    | -4.274747 | -0.439775 | 0.660009  |
| C    | -4.750432 | -0.467528 | 2.058773  |
| H    | -4.097059 | 0.133729  | 2.697873  |
| H    | -5.758075 | -0.049013 | 2.093199  |
| H    | -4.785534 | -1.495643 | 2.430053  |
| C    | -4.201890 | -0.060300 | -1.538281 |
| H    | -4.381838 | 0.218452  | -2.562985 |
| C    | -4.980538 | 0.109610  | -0.419298 |
| H    | -5.951624 | 0.561595  | -0.306055 |
| C    | 2.706796  | -3.448945 | -0.265306 |
| H    | 3.726259  | -3.837969 | -0.153844 |
| H    | 2.356708  | -3.651993 | -1.283066 |
| C    | 2.202358  | 2.830006  | 1.413832  |
| H    | 3.129824  | 2.268690  | 1.263175  |

|   |           |           |           |
|---|-----------|-----------|-----------|
| H | 2.424583  | 3.903691  | 1.389610  |
| C | 1.806904  | 3.082215  | -1.473024 |
| H | 2.106212  | 4.124205  | -1.306741 |
| H | 2.693168  | 2.485710  | -1.710797 |
| H | 1.122530  | 3.036730  | -2.326487 |
| C | -0.376365 | 3.687733  | 0.366231  |
| H | -0.866860 | 3.495700  | 1.326768  |
| H | 0.059967  | 4.693988  | 0.383246  |
| H | -1.128730 | 3.637997  | -0.428398 |
| C | 3.534437  | -1.494773 | 1.736849  |
| H | 2.911691  | -1.963323 | 2.505883  |
| H | 4.501945  | -2.009621 | 1.694059  |
| H | 3.694195  | -0.448032 | 2.013625  |
| C | 4.017522  | -0.985313 | -1.103741 |
| H | 4.231611  | 0.070632  | -0.910239 |
| H | 4.934303  | -1.569931 | -0.959947 |
| H | 3.684752  | -1.087138 | -2.141640 |
| H | 2.048235  | -3.966363 | 0.440588  |
| H | 1.794367  | 2.567892  | 2.395129  |

**PR-A130**

B3lyp/lanl2dz optimized geometry

Energy = -723.757702 a.u.

Enthalpy Correction (inc. ZPVE) = 0.429011

NIMAG = 0

B3lyp/lanl2dzaug:6-311+G(2d,p) single point

Energy = -1393.817739

| Atom | x-coord   | y-coord   | z-coord   |
|------|-----------|-----------|-----------|
| Pd   | 0.784191  | -0.002428 | 0.004659  |
| P    | 0.717520  | 2.476629  | -0.010490 |
| P    | 2.723605  | -1.545532 | -0.084248 |
| C    | -1.902601 | -1.531810 | -1.166903 |
| H    | -2.183755 | -1.422766 | -2.216815 |
| H    | -0.956954 | -0.959997 | -0.996902 |
| H    | -1.674191 | -2.587607 | -0.975658 |
| C    | -2.976356 | -1.040113 | -0.263293 |
| N    | -4.210568 | -0.575654 | -0.623185 |
| C    | -4.729034 | -0.486474 | -2.004201 |
| H    | -4.135069 | 0.219262  | -2.592380 |
| H    | -4.713171 | -1.469976 | -2.482247 |
| H    | -5.760951 | -0.132297 | -1.967133 |
| N    | -2.895746 | -0.953749 | 1.095869  |
| C    | -1.715093 | -1.334607 | 1.900976  |
| H    | -0.807267 | -0.860169 | 1.481094  |
| H    | -1.861283 | -0.983408 | 2.924607  |
| H    | -1.593085 | -2.422510 | 1.904294  |
| C    | -4.914343 | -0.191052 | 0.526475  |
| H    | -5.914359 | 0.207139  | 0.486948  |
| C    | -4.091774 | -0.429640 | 1.600428  |
| H    | -4.255909 | -0.275071 | 2.653662  |

|   |           |           |           |
|---|-----------|-----------|-----------|
| C | 2.674352  | -3.442462 | -0.019343 |
| H | 3.684404  | -3.862614 | -0.097716 |
| H | 2.065011  | -3.823312 | -0.846026 |
| C | 2.057591  | 3.155965  | -1.161779 |
| H | 1.857219  | 2.834909  | -2.188771 |
| H | 2.087447  | 4.251707  | -1.123266 |
| C | -0.757891 | 3.557985  | -0.521846 |
| H | -0.497141 | 4.622722  | -0.484902 |
| H | -1.060869 | 3.300985  | -1.542749 |
| H | -1.600730 | 3.373736  | 0.153367  |
| C | 1.199265  | 3.287620  | 1.631299  |
| H | 2.127299  | 2.838338  | 1.998176  |
| H | 1.344524  | 4.367561  | 1.507176  |
| H | 0.414489  | 3.113817  | 2.374877  |
| C | 3.981497  | -1.182920 | 1.283268  |
| H | 3.541779  | -1.413711 | 2.258841  |
| H | 4.890383  | -1.781287 | 1.146141  |
| H | 4.243328  | -0.120373 | 1.265183  |
| C | 3.777108  | -1.278333 | -1.634630 |
| H | 4.019067  | -0.215521 | -1.732597 |
| H | 4.706822  | -1.857494 | -1.578148 |
| H | 3.213224  | -1.586982 | -2.520774 |
| H | 2.226428  | -3.767885 | 0.925845  |
| H | 3.031535  | 2.758889  | -0.858880 |

## 4. Bite-Angle Separated Products

### **Pdbis (TMP) -A80**

B3lyp/lanl2dz optimized geometry

Energy = -379.186759 a.u.

Enthalpy Correction (inc. ZPVE) = 0.248611

NIMAG = 0

B3lyp/lanl2dzaug:6-311+G(2d,p) single point

Energy = -1049.095200

| Atom | x-coord   | y-coord   | z-coord   |
|------|-----------|-----------|-----------|
| Pd   | 0.000255  | -1.519454 | 0.000134  |
| P    | -1.593660 | 0.379591  | 0.059018  |
| P    | 1.592373  | 0.381082  | -0.059225 |
| C    | 1.802593  | 1.040302  | 1.719420  |
| C    | -1.800078 | 1.041372  | -1.719014 |
| C    | -3.458023 | 0.069391  | 0.400458  |
| H    | -4.074630 | 0.945248  | 0.154892  |
| H    | -3.785115 | -0.786747 | -0.199358 |
| H    | -3.590586 | -0.181343 | 1.458959  |

|   |           |           |           |
|---|-----------|-----------|-----------|
| C | -1.500737 | 2.021330  | 1.044936  |
| H | -0.547887 | 2.537811  | 0.917592  |
| H | -2.311521 | 2.685101  | 0.718979  |
| H | -1.635072 | 1.794938  | 2.108463  |
| C | 1.501456  | 2.024771  | -1.042229 |
| H | 0.550459  | 2.543660  | -0.910748 |
| H | 2.315149  | 2.685569  | -0.717506 |
| H | 1.631815  | 1.800149  | -2.106622 |
| C | 3.455395  | 0.067129  | -0.403952 |
| H | 3.585853  | -0.182234 | -1.463034 |
| H | 4.074474  | 0.941115  | -0.157927 |
| H | 3.781288  | -0.790743 | 0.194028  |
| H | -2.387533 | 1.968531  | -1.733106 |
| H | -0.830786 | 1.212555  | -2.190774 |
| H | -2.328057 | 0.274507  | -2.296340 |
| H | 2.387820  | 1.968865  | 1.733489  |
| H | 0.834183  | 1.208248  | 2.194243  |
| H | 2.334078  | 0.273795  | 2.293998  |

**Pdbis (TMP) -A90**

B3lyp/lanl2dz optimized geometry

Energy = -379.205401 a.u.

Enthalpy Correction (inc. ZPVE) = 0.248733

NIMAG = 0

B3lyp/lanl2dzaug:6-311+G(2d,p) single point

Energy = -1049.114106

| Atom | x-coord   | y-coord   | z-coord   |
|------|-----------|-----------|-----------|
| Pd   | -0.000016 | -1.428733 | -0.000148 |
| P    | 1.753652  | 0.324661  | -0.025831 |
| P    | -1.753219 | 0.325123  | 0.025659  |
| C    | -2.024912 | 1.137023  | -1.676205 |
| C    | 2.023717  | 1.136381  | 1.676381  |
| C    | 3.590687  | -0.024570 | -0.439363 |
| H    | 4.219353  | 0.865386  | -0.297791 |
| H    | 3.950683  | -0.831803 | 0.207596  |
| H    | 3.665240  | -0.359126 | -1.480166 |
| C    | 1.562466  | 1.877075  | -1.118301 |
| H    | 0.639393  | 2.415098  | -0.888757 |
| H    | 2.413853  | 2.550951  | -0.959818 |
| H    | 1.538746  | 1.572994  | -2.170284 |
| C    | -1.562803 | 1.877459  | 1.118360  |
| H    | -0.639834 | 2.415867  | 0.889306  |
| H    | -2.414386 | 2.551063  | 0.959782  |
| H    | -1.539321 | 1.573142  | 2.170291  |
| C    | -3.589684 | -0.025882 | 0.440073  |
| H    | -3.663323 | -0.361571 | 1.480561  |
| H    | -4.219132 | 0.863714  | 0.299745  |
| H    | -3.949437 | -0.832741 | -0.207503 |
| H    | 2.686323  | 2.008303  | 1.599434  |
| H    | 1.069205  | 1.439703  | 2.112891  |
| H    | 2.482201  | 0.394439  | 2.339269  |
| H    | -2.689386 | 2.007495  | -1.598868 |
| H    | -1.071044 | 1.442701  | -2.112502 |
| H    | -2.481744 | 0.394421  | -2.339484 |

**Pdbis (TMP) -A100**

B3lyp/lanl2dz optimized geometry

Energy = -379.217496 a.u.

Enthalpy Correction (inc. ZPVE) = 0.248486

NIMAG = 0

B3lyp/lanl2dzaug:6-311+G(2d,p) single point

Energy = -1049.126868

| Atom | x-coord   | y-coord   | z-coord   |
|------|-----------|-----------|-----------|
| Pd   | -0.000002 | -1.323811 | -0.000095 |
| P    | 1.899801  | 0.270232  | -0.013346 |
| P    | -1.899687 | 0.270373  | 0.013262  |
| C    | -2.183568 | 1.137504  | -1.656321 |
| C    | 2.182788  | 1.137345  | 1.656394  |
| C    | 3.719956  | -0.111996 | -0.453108 |
| H    | 4.355128  | 0.779775  | -0.364148 |
| H    | 4.091896  | -0.892350 | 0.219701  |
| H    | 3.768018  | -0.491249 | -1.479892 |
| C    | 1.660800  | 1.785564  | -1.139645 |
| H    | 0.724175  | 2.295603  | -0.895046 |
| H    | 2.493306  | 2.490581  | -1.019968 |
| H    | 1.615451  | 1.455591  | -2.183001 |
| C    | -1.660612 | 1.785771  | 1.139457  |
| H    | -0.723994 | 2.295780  | 0.894791  |
| H    | -2.493131 | 2.490775  | 1.019796  |
| H    | -1.615207 | 1.455859  | 2.182833  |
| C    | -3.719521 | -0.112425 | 0.453790  |
| H    | -3.766971 | -0.491991 | 1.480480  |
| H    | -4.354987 | 0.779188  | 0.365367  |
| H    | -4.091562 | -0.892687 | -0.219073 |
| H    | 2.912890  | 1.951957  | 1.562756  |
| H    | 1.237267  | 1.537593  | 2.033952  |
| H    | 2.554605  | 0.400556  | 2.376497  |
| H    | -2.914266 | 1.951551  | -1.562433 |
| H    | -1.238395 | 1.538576  | -2.033897 |
| H    | -2.554893 | 0.400562  | -2.376512 |

**Pdbis (TMP) -A110**

B3lyp/lanl2dz optimized geometry

Energy = -379.225550 a.u.

Enthalpy Correction (inc. ZPVE) = 0.248434

NIMAG = 0

B3lyp/lanl2dzaug:6-311+G(2d,p) single point

Energy = -1049.135368

| Atom | x-coord  | y-coord   | z-coord   |
|------|----------|-----------|-----------|
| Pd   | 0.000003 | -1.196911 | -0.000034 |
| P    | 2.031494 | 0.225557  | 0.005607  |

|   |           |           |           |
|---|-----------|-----------|-----------|
| P | -2.031485 | 0.225561  | -0.005631 |
| C | -1.881215 | 1.692975  | -1.204148 |
| C | 1.881476  | 1.692528  | 1.204702  |
| C | 3.830555  | -0.284769 | 0.384808  |
| H | 4.515216  | 0.571877  | 0.324717  |
| H | 3.875505  | -0.715445 | 1.391186  |
| H | 4.143674  | -1.051579 | -0.332102 |
| C | 2.311364  | 1.159472  | -1.625897 |
| H | 1.384880  | 1.661518  | -1.922975 |
| H | 3.113350  | 1.902594  | -1.526560 |
| H | 2.577911  | 0.441393  | -2.408561 |
| C | -2.311747 | 1.158853  | 1.626158  |
| H | -1.385267 | 1.660573  | 1.923792  |
| H | -3.113554 | 1.902175  | 1.526864  |
| H | -2.578719 | 0.440480  | 2.408412  |
| C | -3.830461 | -0.284630 | -0.385431 |
| H | -4.143709 | -1.051803 | 0.331030  |
| H | -4.515145 | 0.571978  | -0.325046 |
| H | -3.875198 | -0.714793 | -1.392037 |
| H | 2.740819  | 2.368511  | 1.107576  |
| H | 0.961476  | 2.247680  | 0.994083  |
| H | 1.830961  | 1.315804  | 2.231685  |
| H | -2.740516 | 2.368987  | -1.106868 |
| H | -0.961203 | 2.247963  | -0.993172 |
| H | -1.830592 | 1.316645  | -2.231268 |

**Pdbis (TMP) -A120**

B3lyp/lanl2dz optimized geometry

Energy = -379.231155 a.u.

Enthalpy Correction (inc. ZPVE) = 0.248689

NIMAG = 0

B3lyp/lanl2dzaug:6-311+G(2d,p) single point

Energy = -1049.141237

| Atom | x-coord   | y-coord   | z-coord   |
|------|-----------|-----------|-----------|
| Pd   | 0.000007  | -1.055024 | -0.000118 |
| P    | -2.147692 | 0.185038  | -0.006118 |
| P    | 2.147777  | 0.184913  | 0.005979  |
| C    | 2.054518  | 1.702355  | 1.143510  |
| C    | -2.051868 | 1.706782  | -1.137677 |
| C    | -3.882549 | -0.447886 | -0.476325 |
| H    | -4.633520 | 0.350851  | -0.412944 |
| H    | -3.856473 | -0.840882 | -1.498564 |
| H    | -4.162248 | -1.263502 | 0.199317  |
| C    | -2.547168 | 1.023377  | 1.650222  |
| H    | -1.666798 | 1.576015  | 1.994198  |
| H    | -3.397723 | 1.710869  | 1.554671  |
| H    | -2.783021 | 0.255917  | 2.394932  |
| C    | 2.542866  | 1.029437  | -1.648263 |
| H    | 1.661825  | 1.583906  | -1.987513 |
| H    | 3.394097  | 1.716062  | -1.552517 |
| H    | 2.776104  | 0.264748  | -2.396635 |
| C    | 3.884036  | -0.449264 | 0.469276  |
| H    | 4.162900  | -1.261121 | -0.211228 |
| H    | 4.634333  | 0.350313  | 0.408511  |



|   |           |           |           |
|---|-----------|-----------|-----------|
| H | 3.860370  | -0.847651 | 1.489480  |
| H | -2.953533 | 2.326568  | -1.048031 |
| H | -1.173712 | 2.301998  | -0.866084 |
| H | -1.938230 | 1.378199  | -2.175987 |
| H | 2.954367  | 2.324426  | 1.051480  |
| H | 1.173627  | 2.296602  | 0.878777  |
| H | 1.947035  | 1.369717  | 2.181197  |

**Pdbis (TMP) -A130**

B3lyp/lanl2dz optimized geometry

Energy = -379.235477 a.u.

Enthalpy Correction (inc. ZPVE) = 0.248643

NIMAG = 0

B3lyp/lanl2dzaug:6-311+G(2d,p) single point

Energy = -1049.145644

| Atom | x-coord   | y-coord   | z-coord   |
|------|-----------|-----------|-----------|
| Pd   | -0.000049 | -0.894352 | -0.003252 |
| P    | 2.247624  | 0.153664  | 0.001727  |
| P    | -2.247659 | 0.153812  | -0.003250 |
| C    | -2.264396 | 1.741908  | -1.041395 |
| C    | 2.407123  | 1.509046  | 1.319721  |
| C    | 3.920345  | -0.725719 | 0.235645  |
| H    | 4.756110  | -0.013993 | 0.207791  |
| H    | 3.920202  | -1.247652 | 1.198760  |
| H    | 4.049762  | -1.468658 | -0.558867 |
| C    | 2.621948  | 1.156717  | -1.564959 |
| H    | 1.792621  | 1.845336  | -1.756372 |
| H    | 3.554460  | 1.726509  | -1.459983 |
| H    | 2.706409  | 0.475743  | -2.418338 |
| C    | -2.815743 | 0.838005  | 1.673254  |
| H    | -2.017882 | 1.457091  | 2.096237  |
| H    | -3.729669 | 1.437771  | 1.571251  |
| H    | -3.003145 | 0.004799  | 2.358764  |
| C    | -3.868950 | -0.642020 | -0.604592 |
| H    | -4.090340 | -1.518957 | 0.013368  |
| H    | -4.707884 | 0.064136  | -0.548087 |
| H    | -3.743249 | -0.973897 | -1.640927 |
| H    | 3.365898  | 2.037005  | 1.234570  |
| H    | 1.586008  | 2.223236  | 1.199804  |
| H    | 2.327794  | 1.057297  | 2.313957  |
| H    | -3.231494 | 2.256405  | -0.968050 |
| H    | -1.469960 | 2.407950  | -0.689351 |
| H    | -2.064810 | 1.490327  | -2.088168 |

**2-Methyl-Imidazolium NN\_2Me<sup>+</sup>**

B3lyp/LANL2DZ optimized geometry

Energy = -344.496943 a.u.

Enthalpy Correction (inc. ZPVE) = 0.179209

NIMAG = 0

B3lyp/6-311+G(2d,p) single point

Energy = -344.649607

| Atom | x-coord | y-coord | z-coord |
|------|---------|---------|---------|
|------|---------|---------|---------|

|   |           |           |           |
|---|-----------|-----------|-----------|
| C | 2.505902  | 0.207988  | 0.008655  |
| N | 1.098118  | -0.250047 | -0.002010 |
| C | 0.000000  | 0.559101  | 0.002976  |
| N | -1.098161 | -0.249933 | -0.001937 |
| C | -2.505926 | 0.208186  | 0.008616  |
| C | 0.686893  | -1.589047 | -0.004264 |
| C | -0.687057 | -1.588977 | -0.004227 |
| H | -2.666113 | 0.960020  | -0.768401 |
| H | -2.764998 | 0.624458  | 0.986963  |
| H | -3.153497 | -0.646469 | -0.195478 |
| H | 2.665623  | 0.961403  | -0.766919 |
| H | 3.153345  | -0.646250 | -0.197591 |
| H | 2.765542  | 0.622307  | 0.987686  |
| H | 1.384976  | -2.409570 | -0.006886 |
| H | -1.385221 | -2.409430 | -0.006823 |
| C | 0.000180  | 2.052857  | -0.007486 |
| H | 0.882684  | 2.448964  | 0.503037  |
| H | 0.001920  | 2.444640  | -1.033683 |
| H | -0.883916 | 2.449135  | 0.500100  |

## 5. Twist-Angle Complexes

### CX-D15

B3lyp/lanl2dz optimized geometry

Energy = -723.725866 a.u.

Enthalpy Correction (inc. ZPVE) = 0.427997

NIMAG = 0

B3lyp/lanl2dzaug:6-311+G(2d,p) single point

Energy = -1393.787559

| Atom | x-coord   | y-coord   | z-coord   |
|------|-----------|-----------|-----------|
| N    | 3.067887  | 0.585634  | 0.058436  |
| C    | 2.050904  | -0.351621 | -0.059066 |
| C    | 2.956097  | 1.980064  | 0.499654  |
| N    | 2.742138  | -1.531600 | -0.314378 |
| C    | 2.171740  | -2.827374 | -0.724783 |
| C    | 4.332845  | 0.009920  | -0.146361 |
| C    | 4.131220  | -1.332375 | -0.293588 |
| H    | 2.309068  | -3.578036 | 0.059727  |
| H    | 1.109585  | -2.700484 | -0.923557 |
| H    | 2.669373  | -3.164620 | -1.639793 |
| H    | 5.244968  | 0.581109  | -0.083883 |
| H    | 4.832556  | -2.130046 | -0.478152 |
| H    | 1.927665  | 2.193411  | 0.767700  |
| H    | 3.583979  | 2.137539  | 1.383162  |
| H    | 3.283708  | 2.662137  | -0.291621 |
| Pd   | -0.065399 | -0.295124 | 0.103348  |
| P    | -0.656882 | 2.099957  | -0.149902 |
| P    | -2.404562 | -1.098229 | -0.080331 |
| C    | 0.157534  | -1.941559 | 1.402693  |
| C    | -3.664515 | -0.596896 | 1.234114  |
| C    | -0.544736 | 2.850894  | 1.591098  |
| C    | 0.242931  | 3.355592  | -1.257099 |

|   |           |           |           |
|---|-----------|-----------|-----------|
| C | -2.421211 | 2.658977  | -0.581210 |
| C | -2.609360 | -2.974756 | -0.073901 |
| C | -3.243385 | -0.674378 | -1.717182 |
| H | -0.120240 | -2.902090 | 0.964106  |
| H | 1.183623  | -1.973984 | 1.772266  |
| H | -0.521310 | -1.687196 | 2.228027  |
| H | -0.031693 | 3.149964  | -2.297242 |
| H | -0.065475 | 4.376695  | -1.004814 |
| H | -3.166622 | 2.114984  | 0.003946  |
| H | -2.523587 | 3.728692  | -0.366406 |
| H | -2.612586 | 2.500944  | -1.646753 |
| H | -2.331152 | -3.388338 | 0.898373  |
| H | -3.655145 | -3.228015 | -0.280390 |
| H | -1.975159 | -3.422018 | -0.845310 |
| H | -2.635275 | -1.063544 | -2.540017 |
| H | -4.237389 | -1.133381 | -1.760946 |
| H | -3.343646 | 0.404951  | -1.837293 |
| H | -0.669120 | 3.938812  | 1.544594  |
| H | 0.404297  | 2.616874  | 2.078628  |
| H | -1.348201 | 2.430058  | 2.204685  |
| H | -3.326219 | -0.955262 | 2.211587  |
| H | -3.770913 | 0.489770  | 1.281804  |
| H | -4.641549 | -1.040700 | 1.012404  |
| H | 1.325935  | 3.274392  | -1.169973 |

**CX-D30**

B3lyp/lanl2dz optimized geometry

Energy = -723.734319 a.u.

Enthalpy Correction (inc. ZPVE) = 0.429128

NIMAG = 0

B3lyp/lanl2dzaug:6-311+G(2d,p) single point

Energy = -1393.796764

| Atom | x-coord   | y-coord   | z-coord   |
|------|-----------|-----------|-----------|
| N    | 2.888713  | 0.520414  | 0.532439  |
| C    | 1.999181  | -0.403081 | 0.001689  |
| C    | 2.575036  | 1.550869  | 1.535737  |
| N    | 2.822549  | -1.408142 | -0.477362 |
| C    | 2.421194  | -2.548082 | -1.321518 |
| C    | 4.224099  | 0.126217  | 0.314305  |
| C    | 4.175942  | -1.139262 | -0.197426 |
| H    | 1.363392  | -2.457719 | -1.561047 |
| H    | 2.999586  | -2.533475 | -2.251161 |
| H    | 2.596961  | -3.494519 | -0.800565 |
| H    | 5.060377  | 0.707760  | 0.668202  |
| H    | 4.969192  | -1.800491 | -0.507868 |
| H    | 1.495104  | 1.649381  | 1.627556  |
| H    | 2.972313  | 1.241321  | 2.509019  |
| H    | 3.021610  | 2.509167  | 1.258653  |
| Pd   | -0.090327 | -0.395448 | -0.026268 |
| P    | -0.447395 | 2.040018  | -0.328607 |
| P    | -2.513561 | -0.901406 | 0.123207  |
| C    | 0.065229  | -2.370781 | 0.707764  |
| C    | -3.089649 | -0.960603 | 1.920483  |
| C    | -1.395144 | 2.862913  | 1.087510  |

|   |           |           |           |
|---|-----------|-----------|-----------|
| C | 0.954751  | 3.295195  | -0.611831 |
| C | -1.484070 | 2.501422  | -1.848750 |
| C | -3.005794 | -2.601230 | -0.533325 |
| C | -3.879649 | 0.149967  | -0.656728 |
| H | -0.605002 | -2.453011 | 1.571602  |
| H | -0.225728 | -3.090292 | -0.065069 |
| H | 1.083559  | -2.571912 | 1.043044  |
| H | 1.312134  | 3.704789  | 0.335337  |
| H | 1.785752  | 2.816614  | -1.137322 |
| H | -2.387440 | 1.897598  | -1.921751 |
| H | -1.760371 | 3.561525  | -1.811299 |
| H | -0.877062 | 2.326800  | -2.743498 |
| H | -2.449430 | -3.385395 | -0.016204 |
| H | -4.078208 | -2.761597 | -0.376079 |
| H | -2.787741 | -2.660035 | -1.604256 |
| H | -3.776844 | 0.157169  | -1.745895 |
| H | -4.851506 | -0.287220 | -0.401887 |
| H | -3.852956 | 1.177545  | -0.284390 |
| H | -1.514892 | 3.934394  | 0.892155  |
| H | -0.853877 | 2.731676  | 2.030103  |
| H | -2.386337 | 2.412546  | 1.194313  |
| H | -2.470615 | -1.658384 | 2.490291  |
| H | -2.998605 | 0.032138  | 2.372206  |
| H | -4.135101 | -1.283911 | 1.973621  |
| H | 0.575523  | 4.121783  | -1.221482 |

**CX-D45**

B3lyp/lanl2dz optimized geometry

Energy = -723.746639 a.u.

Enthalpy Correction (inc. ZPVE) = 0.428938

NIMAG = 0

B3lyp/lanl2dzaug:6-311+G(2d,p) single point

Energy = -1393.809317

| Atom | x-coord   | y-coord   | z-coord   |
|------|-----------|-----------|-----------|
| N    | 2.789090  | 0.321700  | 0.797522  |
| C    | 1.932532  | -0.468099 | 0.048634  |
| C    | 2.392851  | 1.206204  | 1.903875  |
| N    | 2.773941  | -1.353961 | -0.595057 |
| C    | 2.377975  | -2.339087 | -1.615970 |
| C    | 4.132398  | -0.033120 | 0.573240  |
| C    | 4.114827  | -1.142294 | -0.226527 |
| H    | 1.311854  | -2.234264 | -1.813194 |
| H    | 2.933833  | -2.155491 | -2.541405 |
| H    | 2.582851  | -3.355948 | -1.266089 |
| H    | 4.952272  | 0.456163  | 1.074057  |
| H    | 4.925269  | -1.724832 | -0.634223 |
| H    | 1.310776  | 1.331854  | 1.889928  |
| H    | 2.671864  | 0.749734  | 2.859983  |
| H    | 2.887237  | 2.179362  | 1.821277  |
| Pd   | -0.139595 | -0.417745 | -0.023480 |
| P    | -0.278285 | 2.031817  | -0.385163 |
| P    | -2.584188 | -0.793576 | 0.158493  |
| C    | -0.042576 | -2.457804 | 0.504374  |
| C    | -3.097998 | -1.006891 | 1.962154  |

|   |           |           |           |
|---|-----------|-----------|-----------|
| C | -0.937118 | 3.083883  | 1.043584  |
| C | 1.296102  | 2.958549  | -0.883705 |
| C | -1.379445 | 2.601799  | -1.817657 |
| C | -3.211650 | -2.377212 | -0.651330 |
| C | -3.883736 | 0.438094  | -0.446890 |
| H | -0.710112 | -2.633329 | 1.356264  |
| H | -0.362993 | -3.059006 | -0.355148 |
| H | 0.971143  | -2.738381 | 0.796782  |
| H | 2.083489  | 2.850673  | -0.138061 |
| H | 1.658176  | 2.548886  | -1.832078 |
| H | -2.428273 | 2.378539  | -1.619323 |
| H | -1.270794 | 3.682071  | -1.965663 |
| H | -1.075670 | 2.085007  | -2.733540 |
| H | -2.667251 | -3.241322 | -0.264625 |
| H | -4.279634 | -2.505163 | -0.442700 |
| H | -3.062165 | -2.321968 | -1.734161 |
| H | -3.803697 | 0.569417  | -1.529746 |
| H | -4.882356 | 0.052502  | -0.213544 |
| H | -3.761358 | 1.407163  | 0.045988  |
| H | -1.007250 | 4.134152  | 0.739076  |
| H | -0.276317 | 3.013231  | 1.912804  |
| H | -1.931323 | 2.734005  | 1.338731  |
| H | -2.508359 | -1.800572 | 2.428250  |
| H | -2.921431 | -0.076261 | 2.510714  |
| H | -4.160877 | -1.264974 | 2.027291  |
| H | 1.073366  | 4.023104  | -1.017465 |

**CX-D60**

B3lyp/lanl2dz optimized geometry

Energy = -723.754596 a.u.

Enthalpy Correction (inc. ZPVE) = 0.428453

NIMAG = 0

B3lyp/lanl2dzaug:6-311+G(2d,p) single point

Energy = -1393.816780

| Atom | x-coord   | y-coord   | z-coord   |
|------|-----------|-----------|-----------|
| N    | 2.745103  | 0.110374  | 0.971503  |
| C    | 1.898513  | -0.499259 | 0.066710  |
| C    | 2.319254  | 0.845860  | 2.171081  |
| N    | 2.738249  | -1.223983 | -0.751371 |
| C    | 2.315939  | -2.024999 | -1.911667 |
| C    | 4.088070  | -0.203826 | 0.697081  |
| C    | 4.079074  | -1.080584 | -0.354333 |
| H    | 1.232974  | -1.948642 | -2.013029 |
| H    | 2.792162  | -1.648367 | -2.823176 |
| H    | 2.590842  | -3.074999 | -1.767916 |
| H    | 4.906186  | 0.165347  | 1.294098  |
| H    | 4.893119  | -1.561710 | -0.871902 |
| H    | 1.234494  | 0.962469  | 2.145381  |
| H    | 2.585446  | 0.281280  | 3.071164  |
| H    | 2.800879  | 1.828488  | 2.214604  |
| Pd   | -0.156386 | -0.423127 | 0.006032  |
| P    | -0.200863 | 2.025907  | -0.382112 |
| P    | -2.611866 | -0.742090 | 0.144877  |
| C    | -0.068900 | -2.482205 | 0.446568  |

|   |           |           |           |
|---|-----------|-----------|-----------|
| C | -3.164601 | -0.942888 | 1.937639  |
| C | -0.962854 | 3.104396  | 0.973176  |
| C | 1.459648  | 2.886690  | -0.663517 |
| C | -1.124273 | 2.611162  | -1.926579 |
| C | -3.269470 | -2.307470 | -0.674827 |
| C | -3.846006 | 0.535883  | -0.498273 |
| H | -0.719886 | -2.686498 | 1.305735  |
| H | -0.419627 | -3.034955 | -0.434069 |
| H | 0.947637  | -2.795515 | 0.696020  |
| H | 2.085627  | 2.824482  | 0.229181  |
| H | 1.984885  | 2.403902  | -1.493299 |
| H | -2.180346 | 2.340146  | -1.869951 |
| H | -1.040761 | 3.699046  | -2.029364 |
| H | -0.687767 | 2.135474  | -2.810637 |
| H | -2.757779 | -3.185612 | -0.274601 |
| H | -4.344766 | -2.404506 | -0.488299 |
| H | -3.095441 | -2.260382 | -1.754348 |
| H | -3.745351 | 0.640131  | -1.582783 |
| H | -4.866005 | 0.205766  | -0.272184 |
| H | -3.681890 | 1.508666  | -0.025624 |
| H | -0.902809 | 4.163353  | 0.697564  |
| H | -0.430434 | 2.954228  | 1.917783  |
| H | -2.013671 | 2.838323  | 1.123488  |
| H | -2.610053 | -1.760986 | 2.405977  |
| H | -2.962506 | -0.022643 | 2.494705  |
| H | -4.236895 | -1.163096 | 1.985625  |
| H | 1.296597  | 3.942112  | -0.908361 |

**CX-D75**

B3lyp/lanl2dz optimized geometry

Energy = -723.758229 a.u.

Enthalpy Correction (inc. ZPVE) = 0.428099

NIMAG = 0

B3lyp/lanl2dzaug:6-311+G(2d,p) single point

Energy = -1393.820975

| Atom | x-coord   | y-coord   | z-coord   |
|------|-----------|-----------|-----------|
| N    | 2.724719  | -0.174238 | 1.091623  |
| C    | 1.882840  | -0.512022 | 0.054354  |
| C    | 2.286864  | 0.298146  | 2.413100  |
| N    | 2.719692  | -0.982778 | -0.932702 |
| C    | 2.279321  | -1.476909 | -2.246635 |
| C    | 4.066748  | -0.419520 | 0.750160  |
| C    | 4.061738  | -0.942160 | -0.516093 |
| H    | 1.188957  | -1.443460 | -2.280736 |
| H    | 2.688198  | -0.851217 | -3.047402 |
| H    | 2.610546  | -2.510269 | -2.391974 |
| H    | 4.884782  | -0.228972 | 1.425736  |
| H    | 4.876618  | -1.265501 | -1.143235 |
| H    | 1.203810  | 0.436085  | 2.391981  |
| H    | 2.531326  | -0.443098 | 3.181327  |
| H    | 2.776164  | 1.245714  | 2.663673  |
| Pd   | -0.163809 | -0.426409 | 0.012784  |
| P    | -0.170609 | 2.036621  | -0.276769 |
| P    | -2.623820 | -0.729387 | 0.096152  |

|   |           |           |           |
|---|-----------|-----------|-----------|
| C | -0.062188 | -2.508741 | 0.313335  |
| C | -3.230509 | -0.921901 | 1.871821  |
| C | -1.067542 | 3.060628  | 1.037077  |
| C | 1.524440  | 2.872777  | -0.292464 |
| C | -0.908240 | 2.699525  | -1.886664 |
| C | -3.277762 | -2.286484 | -0.740994 |
| C | -3.811008 | 0.568425  | -0.593509 |
| H | -0.727461 | -2.778979 | 1.143268  |
| H | -0.394339 | -2.993661 | -0.613537 |
| H | 0.952424  | -2.836403 | 0.553836  |
| H | 2.028861  | 2.719935  | 0.665898  |
| H | 2.143205  | 2.441454  | -1.085229 |
| H | -1.960022 | 2.413857  | -1.968897 |
| H | -0.830979 | 3.792225  | -1.922511 |
| H | -0.364537 | 2.275957  | -2.737172 |
| H | -2.776312 | -3.169541 | -0.338443 |
| H | -4.356362 | -2.378622 | -0.571996 |
| H | -3.086534 | -2.234370 | -1.817409 |
| H | -3.660166 | 0.675069  | -1.672245 |
| H | -4.845619 | 0.255205  | -0.414210 |
| H | -3.651824 | 1.537327  | -0.111797 |
| H | -0.973770 | 4.130526  | 0.819333  |
| H | -0.633654 | 2.859694  | 2.021951  |
| H | -2.129278 | 2.798941  | 1.067006  |
| H | -2.716132 | -1.762843 | 2.346263  |
| H | -3.009919 | -0.013643 | 2.441255  |
| H | -4.310599 | -1.105271 | 1.891829  |
| H | 1.415183  | 3.948686  | -0.468744 |

**CX-D90**

B3lyp/lanl2dz optimized geometry

Energy = -723.759027 a.u.

Enthalpy Correction (inc. ZPVE) = 0.428094

NIMAG = 0

B3lyp/lanl2dzaug:6-311+G(2d,p) single point

Energy = -1393.822070

| Atom | x-coord   | y-coord   | z-coord   |
|------|-----------|-----------|-----------|
| N    | 2.719025  | -0.555889 | 1.095735  |
| C    | 1.886655  | -0.505180 | 0.000365  |
| C    | 2.267529  | -0.558944 | 2.495243  |
| N    | 2.732867  | -0.569872 | -1.084167 |
| C    | 2.298419  | -0.597939 | -2.489168 |
| C    | 4.065270  | -0.647557 | 0.700006  |
| C    | 4.074041  | -0.657816 | -0.669961 |
| H    | 1.207896  | -0.547586 | -2.514614 |
| H    | 2.718641  | 0.251705  | -3.038304 |
| H    | 2.621493  | -1.528926 | -2.966467 |
| H    | 4.878224  | -0.702073 | 1.405700  |
| H    | 4.895875  | -0.722910 | -1.364377 |
| H    | 1.175803  | -0.539805 | 2.506392  |
| H    | 2.611288  | -1.467080 | 3.001168  |
| H    | 2.656036  | 0.316546  | 3.027205  |
| Pd   | -0.158190 | -0.447312 | -0.015899 |
| P    | -0.189605 | 2.032482  | -0.010193 |

|   |           |           |           |
|---|-----------|-----------|-----------|
| P | -2.620483 | -0.742940 | -0.005079 |
| C | -0.021755 | -2.545869 | -0.003987 |
| C | -3.354422 | -0.691007 | 1.732363  |
| C | -1.315341 | 2.912522  | 1.230069  |
| C | 1.466320  | 2.859232  | 0.371663  |
| C | -0.651251 | 2.868704  | -1.642183 |
| C | -3.280227 | -2.375470 | -0.677436 |
| C | -3.695010 | 0.490206  | -0.950408 |
| H | -0.589469 | -2.918463 | 0.858848  |
| H | -0.467531 | -2.907099 | -0.938543 |
| H | 1.010955  | -2.896678 | 0.067076  |
| H | 1.785098  | 2.601712  | 1.386565  |
| H | 2.228009  | 2.512093  | -0.332662 |
| H | -1.653862 | 2.563724  | -1.954654 |
| H | -0.625590 | 3.959163  | -1.535628 |
| H | 0.059957  | 2.571694  | -2.419655 |
| H | -2.828794 | -3.216082 | -0.145304 |
| H | -4.368189 | -2.415314 | -0.554499 |
| H | -3.036291 | -2.464176 | -1.740644 |
| H | -3.412206 | 0.488819  | -2.007778 |
| H | -4.750613 | 0.208632  | -0.867006 |
| H | -3.570706 | 1.500718  | -0.550869 |
| H | -1.181671 | 3.998171  | 1.163850  |
| H | -1.067615 | 2.586255  | 2.245309  |
| H | -2.365167 | 2.675450  | 1.033510  |
| H | -2.909187 | -1.485550 | 2.339133  |
| H | -3.134627 | 0.271180  | 2.204693  |
| H | -4.440215 | -0.834424 | 1.697354  |
| H | 1.375906  | 3.948577  | 0.294275  |

## 6. Twist-Angle Transition Structures

### TS-D15

B3lyp/lanl2dz optimized geometry

Energy = -723.691682 a.u.

Enthalpy Correction (inc. ZPVE) = 0.425510

NIMAG = 1

B3lyp/lanl2dzaug:6-311+G(2d,p) single point

Energy = -1393.751851

| Atom | x-coord  | y-coord   | z-coord   |
|------|----------|-----------|-----------|
| C    | 3.975903 | -1.300545 | -0.570959 |
| N    | 2.625386 | -1.545154 | -0.298188 |
| C    | 1.975892 | -0.371572 | 0.094370  |
| N    | 2.971708 | 0.597305  | 0.020046  |



|    |           |           |           |
|----|-----------|-----------|-----------|
| C  | 4.178904  | 0.046845  | -0.432442 |
| Pd | -0.051403 | -0.147390 | -0.010898 |
| C  | 1.118593  | -0.785551 | 1.864335  |
| C  | 2.817526  | 2.008887  | 0.385739  |
| C  | 2.007905  | -2.870813 | -0.451148 |
| P  | -0.862902 | 2.189456  | -0.187022 |
| C  | -2.472159 | 2.428199  | -1.166279 |
| P  | -2.162426 | -1.448709 | -0.034316 |
| C  | -2.030526 | -3.264132 | 0.498384  |
| C  | -1.442009 | 2.670426  | 1.556215  |
| C  | 0.011280  | 3.801995  | -0.702175 |
| C  | -2.965481 | -1.632041 | -1.738284 |
| C  | -3.635708 | -0.898924 | 1.024099  |
| H  | 0.192814  | -0.427178 | 2.329905  |
| H  | 1.216146  | -1.867086 | 1.954396  |
| H  | 1.965146  | -0.282056 | 2.337207  |
| H  | 2.618406  | 2.617388  | -0.500854 |
| H  | 1.984595  | 2.112363  | 1.082622  |
| H  | 3.732490  | 2.363570  | 0.869950  |
| H  | 0.989228  | -2.837283 | -0.062428 |
| H  | 1.963821  | -3.147462 | -1.510025 |
| H  | 2.590708  | -3.621469 | 0.093395  |
| H  | 5.070048  | 0.637441  | -0.569414 |
| H  | 4.645968  | -2.072812 | -0.912424 |
| H  | -0.706002 | 4.630775  | -0.698079 |
| H  | 0.820802  | 4.043108  | -0.007486 |
| H  | 0.424197  | 3.695563  | -1.710645 |
| H  | -3.201556 | 1.664085  | -0.882712 |
| H  | -2.901955 | 3.418116  | -0.973655 |
| H  | -2.264475 | 2.332341  | -2.237220 |
| H  | -3.956641 | 0.106992  | 0.735862  |
| H  | -4.477841 | -1.588501 | 0.895606  |
| H  | -3.348062 | -0.884802 | 2.080769  |
| H  | -1.659253 | -3.325230 | 1.526963  |
| H  | -3.009578 | -3.754366 | 0.445836  |
| H  | -1.336827 | -3.796555 | -0.161107 |
| H  | -1.928601 | 3.652553  | 1.541287  |
| H  | -2.153402 | 1.926447  | 1.927938  |
| H  | -0.588535 | 2.707832  | 2.241517  |
| H  | -3.866261 | -2.253446 | -1.678018 |
| H  | -3.234537 | -0.646584 | -2.130472 |
| H  | -2.256770 | -2.096739 | -2.431483 |

**TS-D30**

B3lyp/lanl2dz optimized geometry

Energy = -723.700565 a.u.

Enthalpy Correction (inc. ZPVE) = 0.425374

NIMAG = 1

B3lyp/lanl2dzaug:6-311+G(2d,p) single point

Energy = -1393.760667

| Atom | x-coord  | y-coord   | z-coord   |
|------|----------|-----------|-----------|
| C    | 3.850241 | -1.445872 | -0.707538 |
| N    | 2.477105 | -1.668115 | -0.530601 |
| C    | 1.879512 | -0.588322 | 0.126786  |

|    |           |           |           |
|----|-----------|-----------|-----------|
| N  | 2.929286  | 0.316279  | 0.300706  |
| C  | 4.117959  | -0.179502 | -0.264495 |
| Pd | -0.122388 | -0.225229 | 0.017991  |
| C  | 0.977403  | -1.357888 | 1.715072  |
| C  | 2.887104  | 1.501808  | 1.160600  |
| C  | 1.782763  | -2.857780 | -1.043059 |
| P  | -0.485590 | 2.209900  | -0.279720 |
| C  | -2.075010 | 2.713061  | -1.182612 |
| P  | -2.433443 | -1.124414 | 0.047795  |
| C  | -2.555300 | -2.940955 | 0.570123  |
| C  | -0.754794 | 3.081050  | 1.383425  |
| C  | 0.737736  | 3.369337  | -1.149394 |
| C  | -3.370803 | -1.148217 | -1.595116 |
| C  | -3.705796 | -0.338172 | 1.209229  |
| H  | 0.124442  | -0.966725 | 2.282251  |
| H  | 0.893126  | -2.432955 | 1.553359  |
| H  | 1.888733  | -1.133567 | 2.275863  |
| H  | 3.420484  | 2.331846  | 0.687298  |
| H  | 1.849029  | 1.785390  | 1.329181  |
| H  | 3.356484  | 1.290571  | 2.129848  |
| H  | 0.768104  | -2.884989 | -0.639624 |
| H  | 1.715902  | -2.821034 | -2.135991 |
| H  | 2.322475  | -3.763441 | -0.746230 |
| H  | 5.044882  | 0.369989  | -0.234711 |
| H  | 4.484738  | -2.149120 | -1.222675 |
| H  | 0.400339  | 4.409658  | -1.075036 |
| H  | 1.734821  | 3.284663  | -0.711201 |
| H  | 0.800073  | 3.089991  | -2.206294 |
| H  | -2.942919 | 2.265507  | -0.688586 |
| H  | -2.191792 | 3.802985  | -1.183229 |
| H  | -2.036162 | 2.358570  | -2.217612 |
| H  | -3.854652 | 0.714743  | 0.949184  |
| H  | -4.667229 | -0.859443 | 1.138176  |
| H  | -3.346993 | -0.394853 | 2.242304  |
| H  | -2.110283 | -3.073242 | 1.561884  |
| H  | -3.601185 | -3.266599 | 0.603919  |
| H  | -2.013282 | -3.569248 | -0.144841 |
| H  | -1.027066 | 4.130690  | 1.223332  |
| H  | -1.562386 | 2.582917  | 1.929358  |
| H  | 0.150549  | 3.041776  | 1.996875  |
| H  | -4.351864 | -1.621804 | -1.474173 |
| H  | -3.509556 | -0.126050 | -1.960221 |
| H  | -2.794337 | -1.706409 | -2.339959 |

**TS-D45**

B3lyp/lanl2dz optimized geometry

Energy = -723.709945 a.u.

Enthalpy Correction (inc. ZPVE) = 0.426065

NIMAG = 1

B3lyp/lanl2dzaug:6-311+G(2d,p) single point

Energy = -1393.770289

| Atom | x-coord   | y-coord   | z-coord  |
|------|-----------|-----------|----------|
| C    | -3.851150 | -1.272683 | 0.784757 |
| N    | -2.478927 | -1.561404 | 0.714417 |

|    |           |           |           |
|----|-----------|-----------|-----------|
| C  | -1.832323 | -0.678968 | -0.156480 |
| N  | -2.848920 | 0.185585  | -0.574898 |
| C  | -4.071177 | -0.146083 | 0.040845  |
| Pd | 0.159797  | -0.289609 | -0.063335 |
| C  | -0.926684 | -1.751428 | -1.502961 |
| C  | -2.724408 | 1.136770  | -1.682401 |
| C  | -1.830348 | -2.610682 | 1.512014  |
| P  | 0.323475  | 2.153107  | 0.332578  |
| C  | 1.673864  | 2.757574  | 1.514741  |
| P  | 2.546541  | -0.962663 | -0.092557 |
| C  | 2.887869  | -2.685117 | -0.798029 |
| C  | 0.762593  | 3.121897  | -1.234740 |
| C  | -1.164726 | 3.111841  | 1.000657  |
| C  | 3.393309  | -1.070942 | 1.595484  |
| C  | 3.780376  | 0.083467  | -1.075322 |
| H  | -0.151551 | -1.401991 | -2.195139 |
| H  | -0.701936 | -2.748165 | -1.120332 |
| H  | -1.873759 | -1.777835 | -2.049846 |
| H  | -3.342488 | 2.019644  | -1.492446 |
| H  | -1.680648 | 1.439262  | -1.783098 |
| H  | -3.049320 | 0.680244  | -2.626474 |
| H  | -0.800094 | -2.739066 | 1.172797  |
| H  | -1.808432 | -2.330465 | 2.571252  |
| H  | -2.371848 | -3.556434 | 1.401969  |
| H  | -4.982301 | 0.396133  | -0.153571 |
| H  | -4.521976 | -1.823162 | 1.424651  |
| H  | -0.958331 | 4.188207  | 1.009018  |
| H  | -2.049584 | 2.920263  | 0.389004  |
| H  | -1.373939 | 2.779659  | 2.022624  |
| H  | 2.656322  | 2.434928  | 1.155468  |
| H  | 1.665285  | 3.851471  | 1.586355  |
| H  | 1.507403  | 2.332413  | 2.509521  |
| H  | 3.803004  | 1.105247  | -0.682491 |
| H  | 4.787936  | -0.342500 | -1.008587 |
| H  | 3.479452  | 0.119465  | -2.127520 |
| H  | 2.524971  | -2.744214 | -1.829537 |
| H  | 3.961322  | -2.904966 | -0.786447 |
| H  | 2.365336  | -3.439438 | -0.200354 |
| H  | 0.921759  | 4.179880  | -0.995918 |
| H  | 1.677241  | 2.713358  | -1.675516 |
| H  | -0.040888 | 3.044291  | -1.973595 |
| H  | 4.428110  | -1.416631 | 1.489940  |
| H  | 3.392118  | -0.087425 | 2.075796  |
| H  | 2.847686  | -1.769974 | 2.237561  |

**TS-D60**

B3lyp/lanl2dz optimized geometry

Energy = -723.717234 a.u.

Enthalpy Correction (inc. ZPVE) = 0.426138

NIMAG = 1

B3lyp/lanl2dzaug:6-311+G(2d,p) single point

Energy = -1393.777192

| Atom | x-coord   | y-coord   | z-coord   |
|------|-----------|-----------|-----------|
| C    | -3.846935 | -1.089310 | 0.811643  |
| N    | -2.476794 | -1.394558 | 0.879265  |
| C    | -1.779965 | -0.765338 | -0.157570 |
| N    | -2.763961 | -0.034668 | -0.832339 |
| C    | -4.021131 | -0.212682 | -0.223986 |
| Pd   | 0.196480  | -0.315548 | -0.074812 |
| C    | -0.835926 | -2.080285 | -1.178058 |
| C    | -2.547658 | 0.666808  | -2.100686 |
| C    | -1.875270 | -2.210832 | 1.941063  |
| P    | 0.183485  | 2.131945  | 0.325204  |
| C    | 1.339145  | 2.820523  | 1.654779  |
| P    | 2.618480  | -0.848227 | -0.098664 |
| C    | 3.088751  | -2.408217 | -1.061059 |
| C    | 0.695625  | 3.145088  | -1.188407 |
| C    | -1.453659 | 2.941902  | 0.812813  |
| C    | 3.391590  | -1.195078 | 1.592714  |
| C    | 3.838246  | 0.403790  | -0.823545 |
| H    | -0.106859 | -1.847072 | -1.962831 |
| H    | -0.513493 | -2.934210 | -0.578615 |
| H    | -1.781496 | -2.328441 | -1.669213 |
| H    | -3.183278 | 1.556631  | -2.150217 |
| H    | -1.499766 | 0.968650  | -2.171133 |
| H    | -2.785352 | 0.019968  | -2.955167 |
| H    | -0.847115 | -2.461151 | 1.670339  |
| H    | -1.855180 | -1.660365 | 2.888874  |
| H    | -2.447867 | -3.134736 | 2.075616  |
| H    | -4.916379 | 0.257408  | -0.597434 |
| H    | -4.555784 | -1.461033 | 1.533824  |
| H    | -1.346728 | 4.031661  | 0.858525  |
| H    | -2.231601 | 2.687089  | 0.088042  |
| H    | -1.762498 | 2.570720  | 1.795256  |
| H    | 2.375144  | 2.554314  | 1.422688  |
| H    | 1.257840  | 3.912106  | 1.712441  |
| H    | 1.077202  | 2.390333  | 2.626617  |
| H    | 3.795198  | 1.340215  | -0.257644 |
| H    | 4.861637  | 0.013896  | -0.782464 |
| H    | 3.579452  | 0.610757  | -1.867151 |
| H    | 2.820134  | -2.289366 | -2.116081 |
| H    | 4.165528  | -2.598761 | -0.989369 |
| H    | 2.548410  | -3.271626 | -0.658950 |
| H    | 0.736460  | 4.211912  | -0.939543 |
| H    | 1.681294  | 2.820323  | -1.534935 |
| H    | -0.023451 | 2.998361  | -2.000478 |
| H    | 4.453650  | -1.445435 | 1.489670  |
| H    | 3.292465  | -0.313943 | 2.234747  |
| H    | 2.873323  | -2.032408 | 2.071143  |

**TS-D75**

B3lyp/lanl2dz optimized geometry

Energy = -723.721417 a.u.

Enthalpy Correction (inc. ZPVE) = 0.426022  
NIMAG = 1

B3lyp/lanl2dzaug:6-311+G(2d,p) single point  
Energy = -1393.781286

| Atom | x-coord   | y-coord   | z-coord   |
|------|-----------|-----------|-----------|
| C    | -3.895510 | -0.776671 | 0.791346  |
| N    | -2.541337 | -1.072393 | 1.028927  |
| C    | -1.770405 | -0.794409 | -0.104754 |
| N    | -2.690667 | -0.275833 | -1.023612 |
| C    | -3.987245 | -0.268045 | -0.475447 |
| Pd   | 0.207674  | -0.344452 | -0.058505 |
| C    | -0.829466 | -2.324716 | -0.688044 |
| C    | -2.366920 | 0.075775  | -2.409757 |
| C    | -2.028063 | -1.608660 | 2.295660  |
| P    | 0.159680  | 2.118796  | 0.225227  |
| C    | 1.294362  | 2.890682  | 1.525374  |
| P    | 2.641120  | -0.822539 | -0.071604 |
| C    | 3.142221  | -2.506190 | -0.775329 |
| C    | 0.627884  | 3.087868  | -1.329592 |
| C    | -1.511209 | 2.877099  | 0.675587  |
| C    | 3.476683  | -0.855983 | 1.624810  |
| C    | 3.782846  | 0.334305  | -1.039512 |
| H    | -0.165076 | -2.303458 | -1.559195 |
| H    | -0.416916 | -2.947287 | 0.110198  |
| H    | -1.781640 | -2.758470 | -1.009195 |
| H    | -3.033497 | 0.872339  | -2.754519 |
| H    | -1.333538 | 0.429175  | -2.462570 |
| H    | -2.480608 | -0.788731 | -3.076543 |
| H    | -0.940028 | -1.685012 | 2.239366  |
| H    | -2.281691 | -0.937285 | 3.123794  |
| H    | -2.451665 | -2.599278 | 2.498527  |
| H    | -4.845039 | 0.085632  | -1.024072 |
| H    | -4.656007 | -0.912059 | 1.543241  |
| H    | -1.454721 | 3.971614  | 0.671901  |
| H    | -2.271071 | 2.552113  | -0.041487 |
| H    | -1.808910 | 2.537639  | 1.672777  |
| H    | 2.337583  | 2.642356  | 1.304952  |
| H    | 1.184231  | 3.981162  | 1.536497  |
| H    | 1.042469  | 2.496203  | 2.514887  |
| H    | 3.732626  | 1.344935  | -0.620611 |
| H    | 4.820269  | -0.015562 | -0.992256 |
| H    | 3.467503  | 0.372651  | -2.087280 |
| H    | 2.869859  | -2.561418 | -1.834732 |
| H    | 4.222771  | -2.661815 | -0.679046 |
| H    | 2.619747  | -3.305309 | -0.238930 |
| H    | 0.609936  | 4.165849  | -1.130959 |
| H    | 1.630951  | 2.801231  | -1.659562 |
| H    | -0.079768 | 2.863317  | -2.134032 |
| H    | 4.550617  | -1.050952 | 1.525959  |
| H    | 3.331471  | 0.104493  | 2.129260  |
| H    | 3.028110  | -1.641862 | 2.241245  |

**TS-D90**

B3lyp/lanl2dz optimized geometry

Energy = -723.722773 a.u.

Enthalpy Correction (inc. ZPVE) = 0.426123

NIMAG = 1

B3lyp/lanl2dzaug:6-311+G(2d,p) single point

Energy = -1393.782767

| Atom | x-coord   | y-coord   | z-coord   |
|------|-----------|-----------|-----------|
| C    | -3.944265 | -0.471390 | 0.695607  |
| N    | -2.612315 | -0.661888 | 1.106996  |
| C    | -1.770142 | -0.801778 | -0.001550 |
| N    | -2.622998 | -0.643498 | -1.100173 |
| C    | -3.951242 | -0.460931 | -0.672630 |
| Pd   | 0.209428  | -0.351040 | -0.007975 |
| C    | -0.826160 | -2.428910 | -0.016139 |
| C    | -2.210678 | -0.757949 | -2.503892 |
| C    | -2.184146 | -0.784985 | 2.505162  |
| P    | 0.161989  | 2.128456  | 0.007752  |
| C    | 1.307439  | 3.018035  | 1.219775  |
| P    | 2.644277  | -0.822113 | -0.006311 |
| C    | 3.136276  | -2.558760 | -0.576233 |
| C    | 0.599257  | 2.956842  | -1.633753 |
| C    | -1.512089 | 2.908417  | 0.404833  |
| C    | 3.489321  | -0.725184 | 1.682880  |
| C    | 3.784959  | 0.250126  | -1.068391 |
| H    | -0.257270 | -2.711551 | -0.907557 |
| H    | -0.305019 | -2.724459 | 0.899697  |
| H    | -1.783517 | -2.958804 | -0.046685 |
| H    | -2.735661 | -0.011006 | -3.108263 |
| H    | -1.135957 | -0.575040 | -2.579353 |
| H    | -2.435349 | -1.754980 | -2.903323 |
| H    | -1.115132 | -0.568689 | 2.575346  |
| H    | -2.727770 | -0.064251 | 3.124514  |
| H    | -2.373913 | -1.794252 | 2.891639  |
| H    | -4.766763 | -0.321910 | -1.363671 |
| H    | -4.752636 | -0.342020 | 1.396809  |
| H    | -1.464924 | 3.999358  | 0.310494  |
| H    | -2.269305 | 2.518496  | -0.282303 |
| H    | -1.805486 | 2.651255  | 1.427524  |
| H    | 2.349798  | 2.763909  | 1.001994  |
| H    | 1.183542  | 4.104257  | 1.141614  |
| H    | 1.078263  | 2.705771  | 2.243549  |
| H    | 3.743448  | 1.290452  | -0.728741 |
| H    | 4.820801  | -0.101118 | -1.000663 |
| H    | 3.463171  | 0.209258  | -2.114109 |
| H    | 2.857428  | -2.697134 | -1.626214 |
| H    | 4.216767  | -2.710838 | -0.473322 |
| H    | 2.614532  | -3.310323 | 0.025581  |
| H    | 0.570194  | 4.048153  | -1.534698 |
| H    | 1.601583  | 2.652138  | -1.949197 |
| H    | -0.116037 | 2.650087  | -2.403457 |
| H    | 4.562033  | -0.931027 | 1.593949  |

|   |          |           |          |
|---|----------|-----------|----------|
| H | 3.350044 | 0.272423  | 2.111300 |
| H | 3.041442 | -1.458944 | 2.361034 |

## 7. Twist-Angle Products

### PR-D

B3lyp/lanl2dz optimized geometry

Energy = -723.764941 a.u.

Enthalpy Correction (inc. ZPVE) = 0.429432

NIMAG = 0

B3lyp/lanl2dzaug:6-311+G(2d,p) single point

Energy = -1393.825122

| Atom | x-coord   | y-coord   | z-coord   |
|------|-----------|-----------|-----------|
| C    | 4.559937  | -1.081970 | 0.543259  |
| N    | 3.790294  | -1.307637 | -0.606441 |
| C    | 2.481914  | -1.477684 | -0.248997 |
| N    | 2.418819  | -1.361286 | 1.108788  |
| C    | 3.701445  | -1.118800 | 1.615079  |
| Pd   | -1.138714 | 0.455409  | -0.025723 |
| C    | 1.327133  | -1.728551 | -1.152685 |
| C    | 1.182612  | -1.478796 | 1.915712  |
| C    | 4.318628  | -1.349246 | -1.985959 |
| P    | 0.185071  | 2.552537  | -0.019036 |
| C    | -0.515871 | 3.856217  | -1.195535 |
| P    | -2.967881 | -1.218509 | -0.076188 |
| C    | -2.895048 | -2.769415 | 1.009786  |
| C    | 0.219113  | 3.503324  | 1.616546  |
| C    | 2.021165  | 2.588792  | -0.497283 |
| C    | -3.405272 | -1.965612 | -1.758576 |
| C    | -4.627554 | -0.482728 | 0.450531  |
| H    | 0.509412  | -0.998388 | -0.947244 |
| H    | 1.615326  | -1.639452 | -2.202811 |
| H    | 0.912354  | -2.732364 | -0.992634 |
| H    | 1.383051  | -1.097644 | 2.919487  |
| H    | 0.379103  | -0.878398 | 1.454542  |
| H    | 0.874896  | -2.527681 | 1.982638  |
| H    | 5.405393  | -1.253586 | -1.946946 |
| H    | 4.067740  | -2.301206 | -2.461939 |
| H    | 3.912803  | -0.523240 | -2.577375 |
| H    | 3.893613  | -0.998093 | 2.668076  |
| H    | 5.624252  | -0.920512 | 0.505195  |
| H    | 2.413188  | 3.612138  | -0.458970 |
| H    | 2.597832  | 1.962865  | 0.193335  |
| H    | 2.138889  | 2.202510  | -1.515766 |

|   |           |           |           |
|---|-----------|-----------|-----------|
| H | -1.563241 | 4.044168  | -0.940099 |
| H | 0.047725  | 4.794447  | -1.126185 |
| H | -0.475935 | 3.482442  | -2.223480 |
| H | -4.871981 | 0.361533  | -0.201480 |
| H | -5.426255 | -1.231689 | 0.389307  |
| H | -4.553802 | -0.113934 | 1.478291  |
| H | -2.774554 | -2.475678 | 2.057710  |
| H | -3.813704 | -3.359494 | 0.908566  |
| H | -2.041790 | -3.391258 | 0.717109  |
| H | 0.727764  | 4.467908  | 1.500164  |
| H | -0.807967 | 3.675889  | 1.952606  |
| H | 0.734768  | 2.912266  | 2.380593  |
| H | -4.290109 | -2.609071 | -1.683709 |
| H | -3.605831 | -1.158588 | -2.470200 |
| H | -2.562953 | -2.555847 | -2.134850 |

## 8. Twist-Angle Separated Products

### Pdbis (TMP)

B3lyp/lanl2dz optimized geometry

Energy = -379.246117 a.u.

Enthalpy Correction (inc. ZPVE) = 0.249051

NIMAG = 0

B3lyp/lanl2dzaug:6-311+G(2d,p) single point

Energy = -1049.160267

| Atom | x-coord   | y-coord   | z-coord   |
|------|-----------|-----------|-----------|
| C    | -3.348744 | 1.630737  | -0.420653 |
| H    | -4.440506 | 1.518720  | -0.401051 |
| H    | -3.048051 | 2.394509  | 0.304007  |
| P    | -2.480045 | -0.000544 | -0.001396 |
| C    | -3.326971 | -1.177017 | -1.222128 |
| H    | -3.017379 | -2.204297 | -1.003478 |
| H    | -4.420171 | -1.103125 | -1.155617 |
| H    | -3.006028 | -0.931418 | -2.239726 |
| C    | -3.364813 | -0.468119 | 1.608023  |
| H    | -4.455430 | -0.442636 | 1.485677  |
| H    | -3.055370 | -1.474443 | 1.908845  |
| H    | -3.070102 | 0.231642  | 2.396964  |
| H    | -3.034049 | 1.960029  | -1.416373 |
| Pd   | -0.000114 | 0.006385  | 0.015679  |
| P    | 2.479824  | -0.000704 | -0.000385 |
| C    | 3.343947  | 1.529223  | -0.710297 |
| H    | 3.047181  | 2.410491  | -0.132186 |
| H    | 4.435905  | 1.422099  | -0.678381 |
| H    | 3.022094  | 1.674520  | -1.746710 |
| C    | 3.327064  | -1.376047 | -0.991977 |
| H    | 3.020947  | -2.348073 | -0.591529 |
| H    | 3.003082  | -1.317951 | -2.036257 |
| H    | 4.420247  | -1.288759 | -0.943004 |
| C    | 3.370344  | -0.167688 | 1.663985  |
| H    | 3.076198  | 0.662797  | 2.314170  |
| H    | 3.064587  | -1.103466 | 2.143280  |



H 4.460424 -0.162179 1.535120

2-Methyl-Imidazolium **NN\_2Me<sup>+</sup>**

B3lyp/LANL2DZ optimized geometry

Energy = -344.496943 a.u.

Enthalpy Correction (inc. ZPVE) = 0.179209

NIMAG =

B3lyp/6-311+G(2d,p) single point

Energy = -344.649607

| Atom | x-coord   | y-coord   | z-coord   |
|------|-----------|-----------|-----------|
| C    | 2.505902  | 0.207988  | 0.008655  |
| N    | 1.098118  | -0.250047 | -0.002010 |
| C    | 0.000000  | 0.559101  | 0.002976  |
| N    | -1.098161 | -0.249933 | -0.001937 |
| C    | -2.505926 | 0.208186  | 0.008616  |
| C    | 0.686893  | -1.589047 | -0.004264 |
| C    | -0.687057 | -1.588977 | -0.004227 |
| H    | -2.666113 | 0.960020  | -0.768401 |
| H    | -2.764998 | 0.624458  | 0.986963  |
| H    | -3.153497 | -0.646469 | -0.195478 |
| H    | 2.665623  | 0.961403  | -0.766919 |
| H    | 3.153345  | -0.646250 | -0.197591 |
| H    | 2.765542  | 0.622307  | 0.987686  |
| H    | 1.384976  | -2.409570 | -0.006886 |
| H    | -1.385221 | -2.409430 | -0.006823 |
| C    | 0.000180  | 2.052857  | -0.007486 |
| H    | 0.882684  | 2.448964  | 0.503037  |
| H    | 0.001920  | 2.444640  | -1.033683 |
| H    | -0.883916 | 2.449135  | 0.500100  |

## 9. Twist-Angle CDA Model Complexes

### CX-MOD-D0

B3lyp/lanl2dz:6-31G(d) optimized geometry

Energy = -1118.298920 a.u.

| Atom | x-coord  | y-coord   | z-coord   |
|------|----------|-----------|-----------|
| N    | 2.129531 | 1.001860  | -0.000037 |
| C    | 1.324691 | -0.101727 | -0.000004 |
| C    | 1.703615 | 2.398280  | -0.000122 |
| N    | 2.201944 | -1.149554 | -0.000022 |
| C    | 1.882325 | -2.580483 | 0.000089  |
| C    | 3.467544 | 0.648966  | -0.000048 |
| C    | 3.511561 | -0.705115 | -0.000058 |
| H    | 1.313966 | -2.843685 | 0.893650  |
| H    | 1.313960 | -2.843817 | -0.893434 |
| H    | 2.821496 | -3.135849 | 0.000110  |
| H    | 4.257731 | 1.383208  | -0.000101 |
| H    | 4.350499 | -1.382894 | -0.000084 |
| H    | 1.124100 | 2.620510  | 0.897820  |
| H    | 2.592886 | 3.029997  | -0.000214 |

|    |           |           |           |
|----|-----------|-----------|-----------|
| H  | 1.123988  | 2.620348  | -0.898026 |
| Pd | -0.772757 | -0.246902 | 0.000059  |
| P  | -1.623681 | 2.087208  | 0.000061  |
| P  | -2.928839 | -1.211670 | -0.000148 |
| H  | -0.431729 | -1.762274 | 0.000376  |
| H  | -1.347925 | 2.970454  | 1.066786  |
| H  | -1.347706 | 2.970915  | -1.066251 |
| H  | -3.028776 | 2.230710  | -0.000058 |
| H  | -4.099597 | -0.421959 | -0.000646 |
| H  | -3.233808 | -2.068235 | 1.075290  |
| H  | -3.233191 | -2.068667 | -1.075381 |

**CX-MOD-D15**

B3lyp/lanl2dz:6-31G(d) optimized geometry  
Energy = -1118.301069 a.u.

| Atom | x-coord   | y-coord   | z-coord   |
|------|-----------|-----------|-----------|
| N    | -2.138738 | 0.941858  | -0.201996 |
| C    | -1.307849 | -0.138224 | -0.146715 |
| C    | -1.765032 | 2.308399  | -0.558084 |
| N    | -2.136846 | -1.184408 | 0.136546  |
| C    | -1.748585 | -2.584624 | 0.329732  |
| C    | -3.454585 | 0.573973  | 0.022039  |
| C    | -3.450999 | -0.763755 | 0.240435  |
| H    | -1.319287 | -2.988787 | -0.589360 |
| H    | -1.025211 | -2.669607 | 1.141671  |
| H    | -2.643768 | -3.153204 | 0.585930  |
| H    | -4.264643 | 1.286057  | -0.005368 |
| H    | -4.259712 | -1.446102 | 0.450027  |
| H    | -0.898188 | 2.286090  | -1.217638 |
| H    | -2.593500 | 2.772573  | -1.096729 |
| H    | -1.551994 | 2.900269  | 0.336668  |
| Pd   | 0.779159  | -0.234219 | -0.088128 |
| P    | 1.464359  | 2.079013  | 0.482663  |
| P    | 2.979618  | -1.095207 | -0.156032 |
| H    | 0.484554  | -1.680296 | -0.592458 |
| H    | 1.592385  | 2.987978  | -0.590650 |
| H    | 0.759330  | 2.917718  | 1.372831  |
| H    | 2.751032  | 2.256253  | 1.037405  |
| H    | 4.106158  | -0.301349 | 0.151898  |
| H    | 3.410821  | -1.634838 | -1.383067 |
| H    | 3.242441  | -2.192549 | 0.686969  |

**CX-MOD-D30**

B3lyp/lanl2dz:6-31G(d) optimized geometry  
Energy = -1118.304594 a.u.

| Atom | x-coord   | y-coord   | z-coord   |
|------|-----------|-----------|-----------|
| N    | -2.130981 | 0.884252  | -0.338792 |
| C    | -1.286234 | -0.168905 | -0.164350 |
| C    | -1.770768 | 2.202140  | -0.857376 |
| N    | -2.090786 | -1.192077 | 0.233283  |
| C    | -1.655790 | -2.551814 | 0.563238  |
| C    | -3.441596 | 0.518503  | -0.074879 |
| C    | -3.413820 | -0.786899 | 0.290875  |

|    |           |           |           |
|----|-----------|-----------|-----------|
| H  | -1.274353 | -3.052728 | -0.329397 |
| H  | -0.877217 | -2.523585 | 1.326577  |
| H  | -2.515354 | -3.103522 | 0.946506  |
| H  | -4.264594 | 1.208254  | -0.180455 |
| H  | -4.209627 | -1.456665 | 0.577129  |
| H  | -0.793329 | 2.141488  | -1.334917 |
| H  | -2.503213 | 2.506476  | -1.608531 |
| H  | -1.757254 | 2.944684  | -0.053925 |
| Pd | 0.788796  | -0.224178 | -0.119805 |
| P  | 1.302798  | 2.022301  | 0.775899  |
| P  | 3.028574  | -0.967492 | -0.293788 |
| H  | 0.523621  | -1.611268 | -0.795267 |
| H  | 1.618070  | 3.025300  | -0.167318 |
| H  | 0.385145  | 2.759348  | 1.555078  |
| H  | 2.432114  | 2.177655  | 1.609331  |
| H  | 4.122433  | -0.177668 | 0.122593  |
| H  | 3.477183  | -1.312333 | -1.583241 |
| H  | 3.342812  | -2.158777 | 0.388736  |

**CX-MOD-D45**

B3lyp/lanl2dz:6-31G(d) optimized geometry  
Energy = -1118.307582 a.u.

| Atom | x-coord   | y-coord   | z-coord   |
|------|-----------|-----------|-----------|
| N    | -2.095387 | 0.850433  | -0.471446 |
| C    | -1.267785 | -0.188098 | -0.179479 |
| C    | -1.700547 | 2.105718  | -1.107510 |
| N    | -2.085938 | -1.168293 | 0.285077  |
| C    | -1.662369 | -2.469275 | 0.804132  |
| C    | -3.415799 | 0.517733  | -0.206186 |
| C    | -3.407645 | -0.749176 | 0.277083  |
| H    | -0.754231 | -2.781279 | 0.289113  |
| H    | -1.470348 | -2.408892 | 1.879231  |
| H    | -2.453753 | -3.197726 | 0.617268  |
| H    | -4.231157 | 1.197530  | -0.400101 |
| H    | -4.214288 | -1.385872 | 0.606006  |
| H    | -0.648887 | 2.041977  | -1.386834 |
| H    | -2.292293 | 2.261896  | -2.013023 |
| H    | -1.859581 | 2.946619  | -0.425889 |
| Pd   | 0.798584  | -0.221802 | -0.145243 |
| P    | 1.177022  | 1.890229  | 1.074882  |
| P    | 3.065476  | -0.844995 | -0.428693 |
| H    | 0.559318  | -1.514303 | -1.002569 |
| H    | 1.696601  | 2.978389  | 0.339141  |
| H    | 0.113989  | 2.566034  | 1.711592  |
| H    | 2.098519  | 1.917990  | 2.144349  |
| H    | 4.134001  | -0.082194 | 0.090656  |
| H    | 3.512371  | -0.982947 | -1.756882 |
| H    | 3.431551  | -2.109238 | 0.072627  |

**CX-MOD-D60**

B3lyp/lanl2dz:6-31G(d) optimized geometry  
Energy = -1118.310152 a.u.

| Atom | x-coord | y-coord | z-coord |
|------|---------|---------|---------|
|------|---------|---------|---------|

|    |           |           |           |
|----|-----------|-----------|-----------|
| N  | -2.076793 | 0.832633  | -0.574737 |
| C  | -1.261321 | -0.170732 | -0.160141 |
| C  | -1.649834 | 2.044757  | -1.270859 |
| N  | -2.090163 | -1.116223 | 0.348459  |
| C  | -1.674233 | -2.380593 | 0.954655  |
| C  | -3.406210 | 0.513214  | -0.334603 |
| C  | -3.413283 | -0.710146 | 0.250833  |
| H  | -0.626417 | -2.554479 | 0.710620  |
| H  | -1.795694 | -2.338999 | 2.040873  |
| H  | -2.281283 | -3.194292 | 0.550684  |
| H  | -4.215436 | 1.172646  | -0.608332 |
| H  | -4.230037 | -1.323045 | 0.599780  |
| H  | -0.571179 | 1.997759  | -1.423167 |
| H  | -2.140209 | 2.104955  | -2.245924 |
| H  | -1.905915 | 2.930696  | -0.682501 |
| Pd | 0.800728  | -0.208456 | -0.159575 |
| P  | 1.144643  | 1.733422  | 1.321816  |
| P  | 3.066020  | -0.768286 | -0.563431 |
| H  | 0.536252  | -1.414996 | -1.130560 |
| H  | 1.934798  | 2.812209  | 0.866695  |
| H  | 0.038135  | 2.475779  | 1.786917  |
| H  | 1.784224  | 1.529387  | 2.564066  |
| H  | 4.140641  | -0.058189 | 0.014664  |
| H  | 3.479210  | -0.743242 | -1.909510 |
| H  | 3.457431  | -2.078136 | -0.225001 |

**CX-MOD-D75**

B3lyp/lanl2dz:6-31G(d) optimized geometry  
 Energy = -1118.311440 a.u.

| Atom | x-coord   | y-coord   | z-coord   |
|------|-----------|-----------|-----------|
| N    | -2.070559 | 0.834220  | -0.636553 |
| C    | -1.254209 | -0.136301 | -0.155063 |
| C    | -1.634899 | 2.032939  | -1.350779 |
| N    | -2.081391 | -1.077295 | 0.362297  |
| C    | -1.656322 | -2.321709 | 1.001758  |
| C    | -3.401621 | 0.501772  | -0.423495 |
| C    | -3.407722 | -0.698934 | 0.207726  |
| H    | -0.587613 | -2.451018 | 0.829195  |
| H    | -1.853487 | -2.283732 | 2.076916  |
| H    | -2.197511 | -3.162798 | 0.561531  |
| H    | -4.212396 | 1.139022  | -0.741577 |
| H    | -4.225113 | -1.311671 | 0.555555  |
| H    | -0.545948 | 2.026681  | -1.406940 |
| H    | -2.043311 | 2.031401  | -2.364811 |
| H    | -1.973668 | 2.929676  | -0.824372 |
| Pd   | 0.808153  | -0.174506 | -0.186262 |
| P    | 1.107622  | 1.472841  | 1.623000  |
| P    | 3.064463  | -0.646069 | -0.710440 |
| H    | 0.518553  | -1.216202 | -1.327602 |
| H    | 0.325763  | 2.648061  | 1.605007  |
| H    | 0.801238  | 1.051012  | 2.934857  |
| H    | 2.359131  | 2.069835  | 1.891127  |
| H    | 4.137130  | -0.025124 | -0.034492 |
| H    | 3.459509  | -0.395612 | -2.038829 |
| H    | 3.473680  | -1.988900 | -0.597023 |

**CX-MOD-D90**

B3lyp/lanl2dz:6-31G(d) optimized geometry

Energy = -1118.311744 a.u.

| Atom | x-coord   | y-coord   | z-coord   |
|------|-----------|-----------|-----------|
| N    | 2.076914  | -1.054284 | -0.274105 |
| C    | 1.254593  | 0.019678  | -0.185409 |
| C    | 1.644214  | -2.441352 | -0.435339 |
| N    | 2.074860  | 1.094186  | -0.085251 |
| C    | 1.638742  | 2.486306  | 0.010475  |
| C    | 3.405837  | -0.655778 | -0.224279 |
| C    | 3.404474  | 0.695587  | -0.104950 |
| H    | 0.559177  | 2.521010  | -0.139846 |
| H    | 1.888024  | 2.896144  | 0.993448  |
| H    | 2.128011  | 3.079819  | -0.765844 |
| H    | 4.220831  | -1.360892 | -0.280780 |
| H    | 4.218077  | 1.401165  | -0.035570 |
| H    | 0.558758  | -2.454467 | -0.539590 |
| H    | 2.095558  | -2.867595 | -1.334945 |
| H    | 1.938486  | -3.034035 | 0.435461  |
| Pd   | -0.807264 | 0.026204  | -0.250249 |
| P    | -1.115372 | -0.233881 | 2.181632  |
| P    | -3.056664 | 0.104073  | -0.971064 |
| H    | -0.501637 | 0.188990  | -1.784273 |
| H    | -0.593402 | -1.395181 | 2.791333  |
| H    | -0.512095 | 0.722579  | 3.026401  |
| H    | -2.394512 | -0.251610 | 2.780085  |
| H    | -4.136512 | 0.020644  | -0.065652 |
| H    | -3.455754 | -0.884816 | -1.891003 |
| H    | -3.447905 | 1.254034  | -1.683766 |

**10. LANL2DZAUG:6-311+G(2d,p) Basis Set Implementation**

Gaussian98 Basis Set and Pseudopotential genecp cards:

```

! basis set for high-level single points
-C -H -N -P 0
6-311+G(2d,p)
****
-Pd 0
S 3 1.00
      0.278700D+01 -.161024D+01
      0.196500D+01 0.184898D+01
      0.624300D+00 0.603749D+00
S 3 1.00
      0.278700D+01 0.135408D+01
      0.196500D+01 -.167809D+01
      0.624300D+00 -.855938D+00
S 1 1.00
      0.208100D+00 0.100000D+01
S 1 1.00
      0.832000D-01 0.100000D+01

```

```
S 1 1.00
    0.333000D-01 0.100000D+01
P 3 1.00
    0.599900D+01 -.103491D+00
    0.144300D+01 0.745695D+00
    0.526400D+00 0.365649D+00
P 1 1.00
    0.175500D+00 0.100000D+01
P 1 1.00
    0.585000D-01 0.100000D+01
P 1 1.00
    0.195000D-01 0.100000D+01
D 2 1.00
    0.609100D+01 0.376146D-01
    0.171900D+01 0.520048D+00
D 1 1.00
    0.605600D+00 0.100000D+01
D 1 1.00
    0.188300D+00 0.100000D+01
D 1 1.00
    0.628000D-01 0.100000D+01
F 2 1.00
    0.361217D+01 0.173786D+00
    0.129541D+01 0.597338D+00
F 1 1.00
    0.554710D+00 0.100000D+01
F 1 1.00
    0.237530D+00 0.100000D+01
****
```
