# Supplementary material for: Influence of geometry on reductive elimination of hydrocarbyl–palladium–carbene complexes
Source: Royal Society of Chemistry journal article supplement (doi:10.1039/b417111j), 2005-01-01
Supplement: b417111j1.pdf [file b417111j1.pdf]

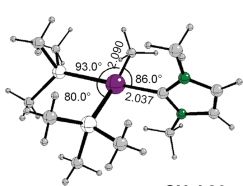

**CX-A80**

Carbene twist angle = 88.7°

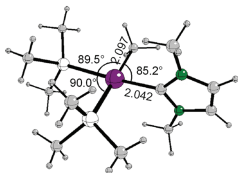

**CX-A90**

Carbene twist angle = 89.1°

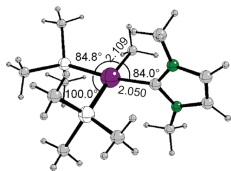

**CX-A100**

Carbene twist angle = 89.7°

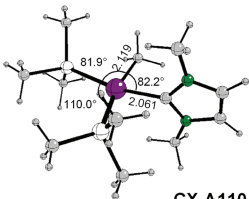

**CX-A110**

Carbene twist angle = 90.0°

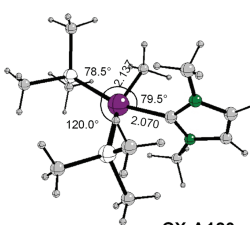

**CX-A120**

Carbene twist angle = 89.2°

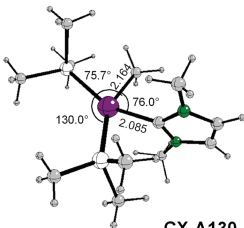

**CX-A130**

Carbene twist angle = 89.1°
