# Supplementary material for: Influence of geometry on reductive elimination of hydrocarbyl–palladium–carbene complexes
Source: Royal Society of Chemistry journal article supplement (doi:10.1039/b417111j), 2005-01-01
Supplement: b417111j2.pdf [file b417111j2.pdf]

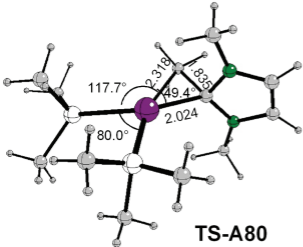

Carbene twist angle = 88.7°

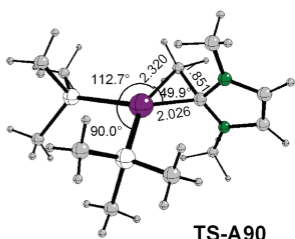

Carbene twist angle = 89.1°

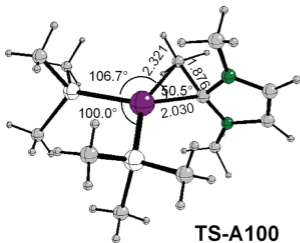

Carbene twist angle = 89.7°

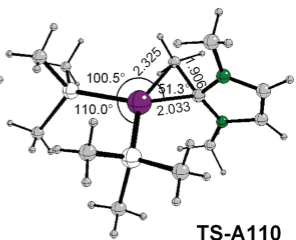

Carbene twist angle = 90.0°

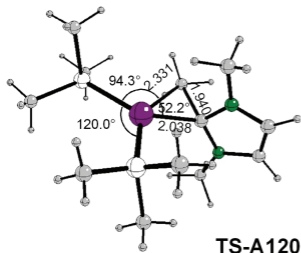

Carbene twist angle = 89.2°

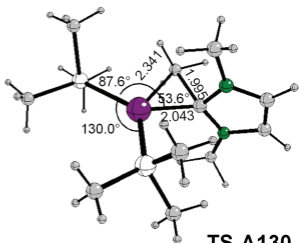

Carbene twist angle = 89.1°
