# Supplementary figures and images for: Influence of geometry on reductive elimination of hydrocarbyl–palladium–carbene complexes
Source: Royal Society of Chemistry journal article supplement (doi:10.1039/b417111j), 2005-01-01

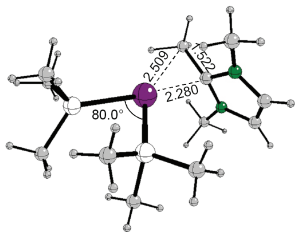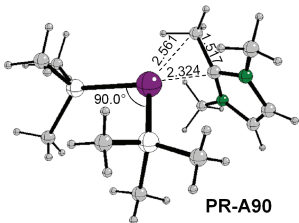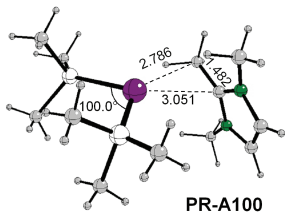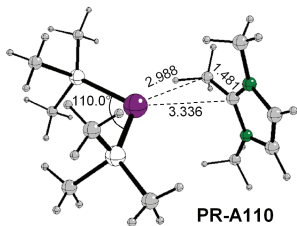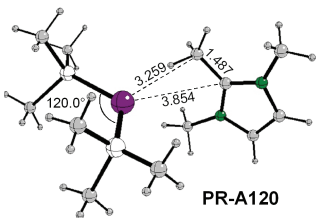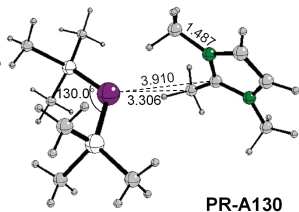

Supplement: b417111j3.pdf [file b417111j3.pdf]

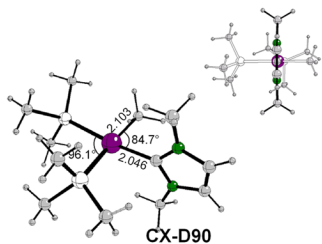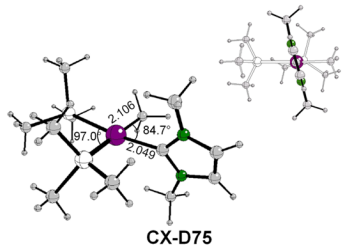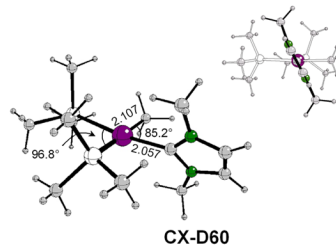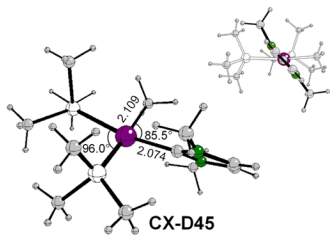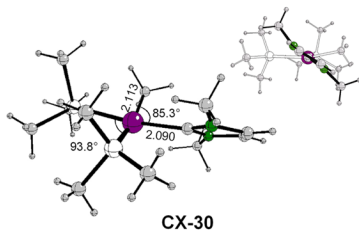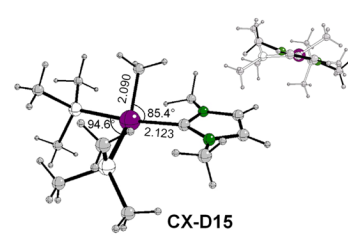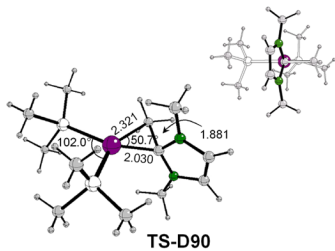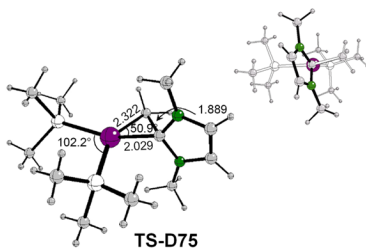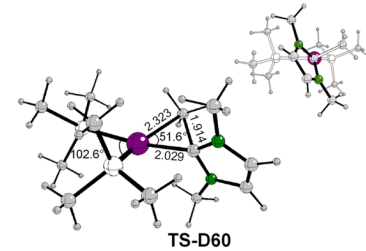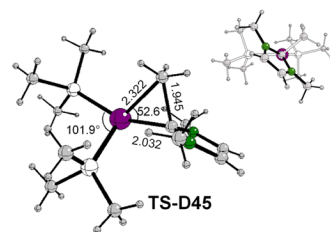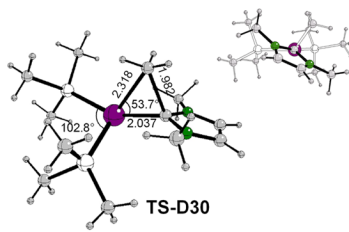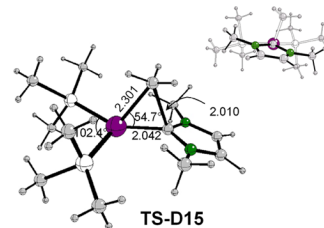

Supplement: b417111j4.pdf [file b417111j4.pdf]
